# Supplementary material for: Intratumoral Restoration of miR-137 Plus Cholesterol Favors Homeostasis of the miR-137/Coactivator p160/AR Axis and Negatively Modulates Tumor Progression in Advanced Prostate Cancer
Source: MDPI journal article supplement (doi:10.3390/ijms24119633), 2023-06-01
Supplement: s1 [file s1]

**Table S1.** Binding regions between miR-137 and its putative target genes, SRC-1, SRC-2, and SRC-3 (TargetScan).

| Name                | Total | microRNAs                                                                                                                                                                                                                                                                                                                                                                                                                                                                                                                                                                                                                                                                                                                                                                                                                                                                                                                                                                                                                                                                                                                                                                                                                                                                                                                                                                                                                                                                                                                                                                                                                                                                                                                                                                                                                                                                                                                                                                                                                                                                                                                                                                                                                                                                                                                                                                                                                                                                                                                                                                                                                                                                                                                                                                                                                                                                                                                                                                                                                                                                                                                                                   |
|---------------------|-------|-------------------------------------------------------------------------------------------------------------------------------------------------------------------------------------------------------------------------------------------------------------------------------------------------------------------------------------------------------------------------------------------------------------------------------------------------------------------------------------------------------------------------------------------------------------------------------------------------------------------------------------------------------------------------------------------------------------------------------------------------------------------------------------------------------------------------------------------------------------------------------------------------------------------------------------------------------------------------------------------------------------------------------------------------------------------------------------------------------------------------------------------------------------------------------------------------------------------------------------------------------------------------------------------------------------------------------------------------------------------------------------------------------------------------------------------------------------------------------------------------------------------------------------------------------------------------------------------------------------------------------------------------------------------------------------------------------------------------------------------------------------------------------------------------------------------------------------------------------------------------------------------------------------------------------------------------------------------------------------------------------------------------------------------------------------------------------------------------------------------------------------------------------------------------------------------------------------------------------------------------------------------------------------------------------------------------------------------------------------------------------------------------------------------------------------------------------------------------------------------------------------------------------------------------------------------------------------------------------------------------------------------------------------------------------------------------------------------------------------------------------------------------------------------------------------------------------------------------------------------------------------------------------------------------------------------------------------------------------------------------------------------------------------------------------------------------------------------------------------------------------------------------------------|
| SRC-1; SRC-2; SRC-3 | 208   | <p>hsa-miR-4743-3p hsa-miR-557 hsa-miR-3690 hsa-miR-6891-5p hsa-miR-377-5p hsa-miR-562 hsa-miR-3681-3p hsa-miR-6780b-5p hsa-miR-23a-3p hsa-miR-489-3p hsa-miR-2110 hsa-miR-4659a-3p hsa-miR-8485 hsa-miR-3653-3p hsa-miR-6511a-5p hsa-miR-4668-5p hsa-miR-205-5p hsa-miR-4477a hsa-miR-1277-5p hsa-miR-4735-3p hsa-miR-507 hsa-miR-6883-5p hsa-miR-4731-5p hsa-let-7g-3p hsa-miR-1301-5p hsa-miR-551b-5p hsa-miR-603 hsa-miR-4505 "Poorly conserved sites hsa-miR-513b-5p hsa-miR-875-3p hsa-miR-4268 hsa-miR-338-5p hsa-miR-200c-3p hsa-miR-4282 hsa-miR-4652-3p hsa-miR-1285-3p hsa-miR-548az-5p hsa-miR-4725-3p hsa-miR-5692c hsa-miR-548t-3p hsa-miR-149-3p hsa-miR-1236-3p hsa-miR-4680-3p hsa-miR-6128 hsa-miR-590-3p hsa-miR-5589-5p hsa-miR-548ae-3p hsa-miR-4728-5p hsa-miR-23c hsa-miR-708-3p hsa-miR-33a-5p hsa-miR-4699-3p hsa-miR-4509 hsa-miR-23b-3p hsa-miR-5004-3p hsa-miR-429 hsa-miR-548aa hsa-miR-5692b hsa-miR-612 hsa-miR-126-5p hsa-miR-488-5p " hsa-miR-362-3p hsa-miR-3646 hsa-miR-548ah-3p hsa-miR-128-3p hsa-miR-548ap-3p hsa-miR-7856-5p hsa-miR-4446-5p hsa-miR-4517 hsa-miR-3128 hsa-miR-145-3p hsa-miR-329-3p hsa-miR-548t-5p hsa-miR-6785-5p hsa-miR-4330 hsa-miR-8067 hsa-miR-130b-5p hsa-miR-1250-3p hsa-miR-548f-5p hsa-miR-7703 hsa-miR-340-5p hsa-miR-3942-3p hsa-miR-548aq-3p hsa-miR-3679-3p hsa-miR-7850-5p hsa-miR-369-3p hsa-miR-410-3p hsa-miR-548x-3p hsa-miR-520d-5p hsa-miR-4653-3p hsa-miR-1252-3p hsa-miR-6809-3p hsa-miR-27a-3p hsa-miR-3124-3p hsa-miR-33b-5p hsa-miR-365b-5p hsa-miR-548aj-3p hsa-miR-548ah-5p hsa-miR-7-2-3p hsa-miR-3123 hsa-miR-181a-2-3p hsa-miR-513a-5p hsa-miR-3163 hsa-miR-18b-5p hsa-miR-18a-5p hsa-miR-9-5p hsa-miR-216a-3p hsa-miR-7-1-3p hsa-miR-374a-5p hsa-miR-3662 hsa-miR-29b-2-5p hsa-miR-514b-5p hsa-miR-3607-3p hsa-miR-6860 hsa-miR-3613-3p hsa-miR-597-3p hsa-miR-548x-5p hsa-miR-493-5p hsa-miR-3934-5p hsa-miR-655-3p hsa-miR-6508-5p hsa-miR-548m hsa-miR-182-3p hsa-miR-3173-3p hsa-miR-4448 hsa-miR-544a-3p hsa-miR-365a-5p hsa-miR-548n hsa-miR-3191-5p hsa-miR-5688 hsa-miR-4753-3p hsa-miR-5787 hsa-miR-195-3p hsa-miR-548aj-5p hsa-miR-506-5p hsa-miR-524-5p hsa-miR-4659b-3p hsa-miR-200b-3p hsa-miR-29a-5p hsa-miR-3941 hsa-miR-26b-3p hsa-miR-4796-3p hsa-miR-4482-3p hsa-miR-6502-5p hsa-miR-3148 hsa-miR-4762-3p hsa-miR-1207-3p hsa-miR-362-5p hsa-miR-6802-3p hsa-miR-382-3p hsa-miR-4796-5p hsa-miR-5187-3p hsa-miR-143-5p hsa-miR-6875-3p hsa-miR-6750-3p hsa-miR-4795-3p hsa-miR-374b-5p hsa-miR-4427 hsa-miR-545-3p hsa-miR-548j-3p hsa-miR-3913-3p hsa-miR-651-3p hsa-let-7a-2-3p hsa-miR-3187-5p hsa-miR-3121-3p hsa-miR-4271 hsa-miR-4254 hsa-miR-607 hsa-miR-7851-3p hsa-miR-578 hsa-miR-4766-5p hsa-miR-548am-3p hsa-miR-3609 hsa-miR-548aw hsa-miR-1468-3p hsa-miR-4719 hsa-miR-361-3p hsa-miR-5189-5p hsa-let-7c-3p hsa-miR-335-5p hsa-miR-16-2-3p hsa-miR-4766-3p hsa-miR-1245b-3p hsa-miR-1299 hsa-miR-548c-3p hsa-miR-1283 hsa-miR-374c-5p hsa-miR-137 hsa-miR-130a-5p hsa-miR-6888-5p hsa-miR-6507-5p hsa-miR-4775 hsa-miR-495-3p hsa-miR-1910-3p hsa-miR-152-5p hsa-miR-4666a-3p hsa-miR-3920 hsa-miR-5580-3p hsa-miR-655-5p hsa-</p> |

|              |     |                                                                                                                                                                                                                                                                                                                                                                                                                                                                                                                                                                                                                                                                                                                                                                                                                                                                                                                                                                                                                                                                                                                                                                                                                                                                                                                                                                                                                                                                                                                                                                                                                                                                                                                                                                                                                                                                                                                                                                                                                                                                                                                                                                                                                                                                                                                                                                                                                                                                                                                                          |
|--------------|-----|------------------------------------------------------------------------------------------------------------------------------------------------------------------------------------------------------------------------------------------------------------------------------------------------------------------------------------------------------------------------------------------------------------------------------------------------------------------------------------------------------------------------------------------------------------------------------------------------------------------------------------------------------------------------------------------------------------------------------------------------------------------------------------------------------------------------------------------------------------------------------------------------------------------------------------------------------------------------------------------------------------------------------------------------------------------------------------------------------------------------------------------------------------------------------------------------------------------------------------------------------------------------------------------------------------------------------------------------------------------------------------------------------------------------------------------------------------------------------------------------------------------------------------------------------------------------------------------------------------------------------------------------------------------------------------------------------------------------------------------------------------------------------------------------------------------------------------------------------------------------------------------------------------------------------------------------------------------------------------------------------------------------------------------------------------------------------------------------------------------------------------------------------------------------------------------------------------------------------------------------------------------------------------------------------------------------------------------------------------------------------------------------------------------------------------------------------------------------------------------------------------------------------------------|
|              |     | miR-6885-3p hsa-miR-27b-3p hsa-miR-548g-5p hsa-miR-513c-5p hsa-miR-6086 hsa-miR-6124 hsa-miR-3671                                                                                                                                                                                                                                                                                                                                                                                                                                                                                                                                                                                                                                                                                                                                                                                                                                                                                                                                                                                                                                                                                                                                                                                                                                                                                                                                                                                                                                                                                                                                                                                                                                                                                                                                                                                                                                                                                                                                                                                                                                                                                                                                                                                                                                                                                                                                                                                                                                        |
| SRC-1; SRC-2 | 164 | <p>hsa-miR-522-5p hsa-miR-518d-5p hsa-miR-4674 hsa-miR-448 hsa-miR-3140-5p hsa-miR-103a-2-5p hsa-miR-3977 hsa-miR-518e-5p hsa-miR-513a-3p hsa-miR-223-3p hsa-miR-7113-5p hsa-miR-3908 hsa-miR-186-3p hsa-miR-4257 hsa-miR-6766-3p hsa-miR-5584-5p hsa-miR-3149 hsa-miR-6841-3p hsa-miR-4777-5p hsa-miR-8071 hsa-miR-23a-5p hsa-miR-8055 hsa-miR-3612 hsa-miR-1207-5p hsa-miR-4438 hsa-miR-6880-5p hsa-miR-5003-3p hsa-miR-586 hsa-miR-3692-3p hsa-miR-627-3p hsa-miR-525-5p hsa-miR-4457 hsa-miR-125b-2-3p hsa-miR-3119 hsa-miR-3606-3p hsa-miR-569 hsa-miR-4731-3p hsa-miR-6782-5p hsa-miR-6757-3p hsa-miR-6514-5p hsa-miR-6857-3p hsa-miR-4802-5p hsa-miR-654-3p hsa-miR-508-3p hsa-miR-4677-5p hsa-miR-8089 hsa-miR-6864-5p hsa-miR-6782-3p hsa-miR-4259 hsa-miR-6754-5p hsa-miR-1257 hsa-miR-4667-5p hsa-miR-567 hsa-miR-4728-3p hsa-miR-937-5p hsa-miR-526a hsa-miR-6828-3p hsa-miR-501-5p hsa-miR-5702 hsa-miR-3185 hsa-miR-4270 hsa-miR-519a-5p hsa-miR-7111-5p hsa-miR-3675-3p hsa-miR-4700-5p hsa-miR-339-5p hsa-miR-4782-3p hsa-miR-135a-5p hsa-miR-3922-5p hsa-miR-1587 hsa-miR-764 hsa-miR-518f-5p hsa-miR-626 hsa-miR-144-5p hsa-miR-4434 hsa-miR-6870-5p hsa-miR-944 hsa-miR-219a-5p hsa-miR-3121-5p hsa-miR-6811-3p hsa-miR-520g-5p hsa-miR-3652 hsa-miR-4428 hsa-miR-3179 hsa-miR-539-5p hsa-miR-8084 hsa-miR-8081 hsa-miR-6876-3p hsa-miR-3180-5p hsa-miR-5698 hsa-miR-4477b hsa-miR-222-5p hsa-miR-4768-5p hsa-miR-4777-3p hsa-miR-335-3p hsa-miR-27a-5p hsa-miR-650 hsa-miR-3140-3p hsa-miR-4325 hsa-miR-3976 hsa-miR-8075 hsa-miR-6825-5p hsa-miR-4443 hsa-miR-4430 hsa-miR-3942-5p hsa-miR-4699-5p hsa-miR-3605-5p hsa-miR-548ay-3p hsa-miR-4763-3p hsa-miR-520a-5p hsa-miR-523-5p hsa-miR-6770-5p hsa-miR-4441 hsa-miR-3620-5p hsa-miR-502-5p hsa-miR-1233-3p hsa-miR-6847-5p hsa-miR-6833-3p hsa-miR-498 hsa-miR-5681b hsa-miR-4445-5p hsa-miR-4786-3p hsa-miR-23b-5p hsa-miR-568 hsa-miR-5703 hsa-miR-184 hsa-miR-135b-5p hsa-miR-125a-3p hsa-miR-520c-5p hsa-miR-6868-5p hsa-miR-6842-3p hsa-miR-4742-3p hsa-miR-452-3p hsa-miR-548at-3p hsa-miR-4670-3p hsa-miR-4708-5p hsa-miR-4703-5p hsa-miR-659-3p hsa-miR-32-3p hsa-miR-2467-3p hsa-miR-4279 hsa-miR-1827 hsa-miR-3165 hsa-miR-4639-5p hsa-miR-297 hsa-miR-412-3p hsa-miR-377-3p hsa-miR-218-1-3p hsa-miR-4804-5p hsa-miR-4516 hsa-miR-409-3p hsa-miR-513c-3p hsa-miR-519b-5p hsa-miR-33a-3p hsa-miR-548g-3p hsa-miR-4461 hsa-miR-519c-5p hsa-miR-4801 hsa-miR-873-5p.1 hsa-miR-548as-3p hsa-miR-6754-3p hsa-miR-4723-5p hsa-miR-1225-3p hsa-miR-4643</p> |
| SRC-1; SRC-3 | 162 | <p>hsa-miR-140-5p hsa-miR-637 hsa-miR-3622b-3p hsa-miR-6887-5p hsa-miR-515-5p hsa-miR-92b-3p hsa-miR-5089-5p hsa-miR-3622a-3p hsa-miR-5692a hsa-miR-892c-5p hsa-miR-26a-2-3p hsa-miR-34a-3p hsa-miR-4513 hsa-miR-661 hsa-miR-499b-3p hsa-miR-5186 hsa-miR-4799-5p hsa-miR-95-5p hsa-miR-1-3p hsa-miR-6787-3p hsa-miR-32-5p hsa-miR-298 hsa-let-7b-5p hsa-miR-6735-5p hsa-miR-302b-5p hsa-miR-4436b-3p hsa-miR-211-3p hsa-miR-320e hsa-miR-4312 hsa-miR-6731-3p hsa-miR-3912-5p hsa-let-7g-5p hsa-miR-3655 hsa-miR-378a-5p hsa-miR-519e-5p hsa-miR-2355-3p hsa-miR-5697 hsa-miR-4682 hsa-miR-3661 hsa-miR-4632-5p hsa-miR-301a-3p hsa-miR-372-5p hsa-miR-1200 hsa-miR-3199 hsa-miR-608 hsa-miR-4698 hsa-let-7i-5p hsa-miR-1273g-3p hsa-miR-1252-5p hsa-miR-500b-3p hsa-miR-584-3p hsa-miR-26a-1-3p hsa-miR-5696 hsa-miR-6881-3p hsa-miR-6721-5p hsa-miR-7843-5p hsa-miR-6882-3p hsa-miR-548e-5p hsa-miR-548q hsa-miR-6855-3p hsa-miR-7151-5p hsa-miR-6757-5p hsa-miR-7114-5p hsa-miR-642a-3p hsa-let-7f-5p hsa-miR-6842-5p hsa-let-7d-5p hsa-miR-4320 hsa-miR-6509-3p hsa-miR-</p>                                                                                                                                                                                                                                                                                                                                                                                                                                                                                                                                                                                                                                                                                                                                                                                                                                                                                                                                                                                                                                                                                                                                                                                                                                                                                                                                                                                                                                                        |

|              |     |                                                                                                                                                                                                                                                                                                                                                                                                                                                                                                                                                                                                                                                                                                                                                                                                                                                                                                                                                                                                                                                                                                                                                                                                                                                                                                                                                                                                                                                                                                                                                                                                                                                                                                                                                                                                                                                                                                                                                                                                                                                                                                                                                                                                                                                                                                                    |
|--------------|-----|--------------------------------------------------------------------------------------------------------------------------------------------------------------------------------------------------------------------------------------------------------------------------------------------------------------------------------------------------------------------------------------------------------------------------------------------------------------------------------------------------------------------------------------------------------------------------------------------------------------------------------------------------------------------------------------------------------------------------------------------------------------------------------------------------------------------------------------------------------------------------------------------------------------------------------------------------------------------------------------------------------------------------------------------------------------------------------------------------------------------------------------------------------------------------------------------------------------------------------------------------------------------------------------------------------------------------------------------------------------------------------------------------------------------------------------------------------------------------------------------------------------------------------------------------------------------------------------------------------------------------------------------------------------------------------------------------------------------------------------------------------------------------------------------------------------------------------------------------------------------------------------------------------------------------------------------------------------------------------------------------------------------------------------------------------------------------------------------------------------------------------------------------------------------------------------------------------------------------------------------------------------------------------------------------------------------|
|              |     | <p>379-3p hsa-miR-206 hsa-miR-4295 hsa-miR-6835-3p hsa-miR-25-3p hsa-miR-367-3p hsa-miR-3922-3p hsa-miR-6792-3p hsa-miR-4436b-5p hsa-miR-1343-3p hsa-miR-3166 hsa-miR-625-5p hsa-miR-216a-5p hsa-miR-6795-5p hsa-miR-6738-3p hsa-miR-130a-3p hsa-miR-5088-3p hsa-miR-500a-3p hsa-miR-5187-5p hsa-miR-138-2-3p hsa-miR-1254 hsa-miR-642b-3p hsa-miR-363-3p hsa-miR-7853-5p hsa-miR-3154 hsa-miR-22-5p hsa-miR-129-5p hsa-miR-6886-3p hsa-miR-411-3p hsa-miR-7111-3p hsa-miR-664b-3p hsa-miR-3925-5p hsa-miR-4458 hsa-miR-4761-3p hsa-miR-215-3p hsa-miR-449c-3p hsa-miR-8052 hsa-miR-5011-5p hsa-miR-92a-3p hsa-miR-4533 hsa-miR-4691-5p hsa-miR-98-5p hsa-miR-6083 hsa-miR-302d-5p hsa-miR-432-5p hsa-miR-5093 hsa-miR-4422 hsa-miR-526b-5p hsa-miR-3176 hsa-miR-1208 hsa-miR-6885-5p hsa-miR-6501-3p hsa-miR-1273d hsa-miR-3116 hsa-miR-4636 hsa-miR-596 hsa-miR-519d-5p hsa-miR-328-5p hsa-miR-8057 hsa-miR-7847-3p hsa-miR-6819-3p hsa-miR-6752-5p hsa-miR-3182 hsa-miR-3654 hsa-miR-4651 hsa-miR-7110-5p hsa-miR-6126 hsa-miR-6780a-3p hsa-miR-4704-3p hsa-let-7e-5p hsa-miR-301b-3p hsa-miR-105-5p hsa-miR-631 hsa-miR-4500 hsa-miR-7109-5p hsa-miR-5695 hsa-miR-3666 hsa-miR-5583-3p hsa-let-7a-5p hsa-miR-499a-3p hsa-miR-130b-3p hsa-let-7c-5p hsa-miR-6783-3p hsa-miR-6772-3p hsa-miR-6165 hsa-miR-454-3p hsa-miR-579-3p hsa-miR-6877-3p hsa-miR-7845-5p hsa-miR-4293 hsa-miR-6879-5p hsa-miR-4695-5p hsa-miR-613</p>                                                                                                                                                                                                                                                                                                                                                                                                                                                                                                                                                                                                                                                                                                                                                                                                                                                                                     |
| SRC-2; SRC-3 | 203 | <p>hsa-miR-5197-3p hsa-miR-6738-5p hsa-miR-6874-3p hsa-miR-3940-5p hsa-miR-4314 hsa-miR-6515-3p hsa-miR-6499-3p hsa-miR-2276-3p hsa-miR-1306-5p hsa-miR-19b-1-5p hsa-miR-4747-5p hsa-miR-6732-5p hsa-miR-548ar-3p hsa-miR-4690-3p hsa-miR-6868-3p hsa-miR-6730-3p hsa-miR-4463 hsa-miR-6794-5p hsa-miR-135a-3p hsa-miR-653-5p hsa-miR-3162-3p hsa-miR-4722-5p hsa-miR-5196-5p hsa-miR-142-5p hsa-miR-766-3p hsa-miR-330-3p hsa-miR-4264 hsa-miR-10a-3p hsa-miR-3928-3p hsa-miR-769-5p hsa-miR-5706 hsa-miR-370-3p hsa-miR-3192-3p hsa-miR-6856-3p hsa-miR-4455 hsa-miR-3189-3p hsa-miR-6805-3p hsa-miR-4739 hsa-miR-576-5p hsa-miR-6504-3p hsa-miR-3925-3p hsa-miR-5585-5p hsa-miR-4804-3p hsa-miR-30a-3p hsa-miR-548d-3p hsa-miR-6733-3p hsa-miR-605-3p hsa-miR-3591-3p hsa-miR-7849-3p hsa-miR-548h-3p hsa-miR-183-3p hsa-miR-223-5p hsa-miR-1914-3p hsa-miR-3686 hsa-miR-4720-3p hsa-miR-3658 hsa-miR-21-3p hsa-miR-383-5p.1 hsa-miR-4666a-5p hsa-miR-656-3p hsa-miR-4782-5p hsa-miR-6839-3p hsa-miR-1323 hsa-miR-4521 hsa-miR-216b-5p hsa-miR-148b-5p hsa-miR-5197-5p hsa-miR-190a-3p hsa-miR-548bb-3p hsa-miR-6818-5p hsa-miR-3927-3p hsa-miR-6867-3p hsa-miR-2052 hsa-miR-6081 hsa-miR-4756-5p hsa-miR-6758-5p hsa-miR-1284 hsa-miR-4499 hsa-miR-1321 hsa-miR-548ax hsa-miR-520h hsa-miR-4713-5p hsa-miR-3607-5p hsa-miR-141-3p hsa-miR-6856-5p hsa-miR-186-5p hsa-miR-3915 hsa-miR-6750-5p hsa-miR-4803 hsa-miR-4772-3p hsa-miR-4251 hsa-miR-5195-3p hsa-miR-1972 hsa-miR-3120-5p hsa-miR-373-5p hsa-miR-4738-3p hsa-miR-423-5p hsa-miR-181c-5p hsa-miR-5685 hsa-miR-200a-3p hsa-miR-153-5p hsa-miR-548e-3p hsa-miR-548ac hsa-miR-6734-5p hsa-miR-219a-2-3p hsa-miR-505-3p.1 hsa-miR-891b hsa-miR-6792-5p hsa-miR-8059 hsa-miR-4520-2-3p hsa-miR-6077 hsa-miR-548o-3p hsa-miR-4789-3p hsa-miR-7702 hsa-miR-6824-5p hsa-miR-548f-3p hsa-miR-6831-5p hsa-miR-378j hsa-miR-6839-5p hsa-miR-4278 hsa-miR-3611 hsa-miR-4456 hsa-miR-5009-3p hsa-miR-3134 hsa-miR-3620-3p hsa-miR-5194 hsa-miR-5590-3p hsa-miR-181d-5p hsa-miR-616-5p hsa-miR-4733-5p hsa-miR-6805-5p hsa-miR-4494 hsa-miR-4645-3p hsa-miR-181b-5p hsa-miR-4760-3p hsa-miR-6893-3p hsa-miR-5589-3p hsa-miR-510-3p hsa-miR-3151-3p hsa-miR-4470 hsa-miR-5691 hsa-miR-6776-5p hsa-miR-5579-3p hsa-miR-6516-3p hsa-miR-151a-3p hsa-miR-4262 hsa-</p> |

|       |     |                                                                                                                                                                                                                                                                                                                                                                                                                                                                                                                                                                                                                                                                                                                                                                                                                                                                                                                                                                                                                                                                                                                                                                                                                                                                                                                                                                                                                                                                                                                                                                                                                                                                                                                                                                                                                                                                                                                                                                                                                                                                                                                                                                                                                                                                                                                                                                                                                                                                                                                                                                                                                                                                                                                                                                                                             |
|-------|-----|-------------------------------------------------------------------------------------------------------------------------------------------------------------------------------------------------------------------------------------------------------------------------------------------------------------------------------------------------------------------------------------------------------------------------------------------------------------------------------------------------------------------------------------------------------------------------------------------------------------------------------------------------------------------------------------------------------------------------------------------------------------------------------------------------------------------------------------------------------------------------------------------------------------------------------------------------------------------------------------------------------------------------------------------------------------------------------------------------------------------------------------------------------------------------------------------------------------------------------------------------------------------------------------------------------------------------------------------------------------------------------------------------------------------------------------------------------------------------------------------------------------------------------------------------------------------------------------------------------------------------------------------------------------------------------------------------------------------------------------------------------------------------------------------------------------------------------------------------------------------------------------------------------------------------------------------------------------------------------------------------------------------------------------------------------------------------------------------------------------------------------------------------------------------------------------------------------------------------------------------------------------------------------------------------------------------------------------------------------------------------------------------------------------------------------------------------------------------------------------------------------------------------------------------------------------------------------------------------------------------------------------------------------------------------------------------------------------------------------------------------------------------------------------------------------------|
|       |     | miR-582-3p hsa-miR-570-3p hsa-miR-520g-3p hsa-miR-3974 hsa-miR-7156-5p hsa-miR-325-3p hsa-miR-619-3p hsa-miR-4309 hsa-miR-3184-5p hsa-miR-664a-3p hsa-miR-767-3p hsa-miR-19a-5p hsa-miR-4529-3p hsa-miR-30e-3p hsa-miR-3198 hsa-miR-4471 hsa-miR-4772-5p hsa-miR-802 hsa-miR-3714 hsa-miR-545-5p hsa-miR-371b-5p hsa-miR-4668-3p hsa-miR-146a-3p hsa-miR-7151-3p hsa-miR-450b-5p hsa-miR-6783-5p hsa-miR-4716-3p hsa-miR-4495 hsa-miR-548a-3p hsa-miR-494-3p hsa-miR-19b-2-5p hsa-miR-451b hsa-miR-150-5p hsa-miR-3133 hsa-miR-8063 hsa-miR-203b-3p hsa-miR-4724-5p hsa-miR-30d-3p hsa-miR-4266 hsa-miR-4273 hsa-miR-219b-3p hsa-miR-181a-5p hsa-miR-6822-5p hsa-miR-629-3p hsa-miR-548z hsa-miR-577 hsa-miR-888-3p hsa-miR-4507 hsa-miR-548az-3p hsa-miR-1251-3p hsa-miR-548ao-5p hsa-miR-5095 hsa-miR-5582-3p hsa-miR-145-5p hsa-miR-3935 hsa-miR-4768-3p hsa-miR-512-5p                                                                                                                                                                                                                                                                                                                                                                                                                                                                                                                                                                                                                                                                                                                                                                                                                                                                                                                                                                                                                                                                                                                                                                                                                                                                                                                                                                                                                                                                                                                                                                                                                                                                                                                                                                                                                                                                                                                                  |
| SRC-1 | 250 | hsa-miR-4709-3p hsa-miR-6876-5p hsa-miR-3680-5p hsa-miR-367-5p hsa-miR-6760-3p hsa-miR-2278 hsa-miR-6759-3p hsa-miR-3688-5p hsa-miR-4677-3p hsa-miR-3122 hsa-miR-1248 hsa-miR-548b-5p hsa-miR-3074-5p hsa-miR-4525 hsa-miR-449a hsa-miR-4765 hsa-miR-6815-3p hsa-miR-6088 hsa-miR-4710 hsa-miR-6833-5p hsa-miR-191-3p hsa-miR-1915-3p hsa-miR-8073 hsa-miR-1301-3p hsa-miR-1273f hsa-miR-4491 hsa-miR-6751-5p hsa-miR-939-3p hsa-miR-548ad-5p hsa-miR-129-1-3p hsa-miR-6762-3p hsa-miR-548ae-5p hsa-miR-96-5p hsa-miR-5579-5p hsa-miR-4721 hsa-miR-17-3p hsa-miR-376a-3p hsa-miR-92a-1-5p hsa-miR-548am-5p hsa-miR-1255b-5p hsa-miR-670-3p hsa-miR-573 hsa-miR-4304 hsa-miR-148b-3p hsa-miR-3692-5p hsa-miR-8074 hsa-miR-513b-3p hsa-miR-152-3p hsa-miR-2277-3p hsa-miR-4277 hsa-miR-4496 hsa-miR-4679 hsa-miR-548d-5p hsa-miR-769-3p hsa-miR-143-3p hsa-miR-4323 hsa-miR-4665-5p hsa-miR-3129-5p hsa-miR-1343-5p hsa-miR-3960 hsa-miR-548aq-5p hsa-miR-4420 hsa-miR-6506-5p hsa-miR-676-3p hsa-miR-3142 hsa-miR-7106-5p hsa-miR-376b-3p hsa-miR-491-3p hsa-miR-4659a-5p hsa-miR-4778-3p hsa-miR-376c-3p hsa-miR-4758-3p hsa-miR-1263 hsa-miR-670-5p hsa-miR-4659b-5p hsa-miR-1914-5p hsa-miR-181b-3p hsa-miR-5047 hsa-miR-6829-5p hsa-miR-492 hsa-miR-3175 hsa-miR-3158-5p hsa-miR-4742-5p hsa-miR-4476 hsa-miR-5580-5p hsa-miR-4705 hsa-miR-2116-5p hsa-miR-6840-3p hsa-miR-1271-5p hsa-miR-548j-5p hsa-miR-548ay-5p hsa-miR-3936 hsa-miR-4799-3p hsa-miR-2053 hsa-miR-1236-5p hsa-miR-487a-5p hsa-miR-548au-3p hsa-miR-939-5p hsa-miR-8072 hsa-miR-5010-5p hsa-miR-4684-3p hsa-miR-6728-5p hsa-miR-548o-5p hsa-miR-3688-3p hsa-miR-1265 hsa-miR-5694 hsa-miR-3659 hsa-miR-6882-5p hsa-miR-4694-3p hsa-miR-548h-5p hsa-miR-1275 hsa-miR-22-3p hsa-miR-1205 hsa-miR-34c-5p hsa-miR-889-5p hsa-miR-3619-3p hsa-miR-3127-5p hsa-miR-6503-3p hsa-miR-4284 hsa-miR-1184 hsa-miR-517-5p hsa-miR-4635 hsa-miR-4797-5p hsa-miR-604 hsa-miR-181b-2-3p hsa-miR-493-3p hsa-miR-6763-5p hsa-miR-890 hsa-miR-548a-5p hsa-miR-647 hsa-miR-4726-3p hsa-miR-559 hsa-miR-127-5p hsa-miR-6869-5p hsa-miR-383-5p.2 hsa-miR-6776-3p hsa-miR-24-3p hsa-miR-1238-3p hsa-miR-3190-3p hsa-miR-8068 hsa-miR-138-5p hsa-miR-6852-3p hsa-miR-6816-3p hsa-miR-658 hsa-miR-182-5p hsa-miR-1245b-5p hsa-miR-548ak hsa-miR-5588-5p hsa-miR-2467-5p hsa-miR-6872-3p hsa-miR-4439 hsa-miR-548c-5p hsa-miR-514a-3p hsa-miR-3909 hsa-miR-5585-3p hsa-miR-1911-3p hsa-miR-4417 hsa-miR-548ap-5p hsa-miR-4637 hsa-miR-653-3p hsa-miR-299-5p hsa-miR-6803-5p hsa-miR-7977 hsa-miR-5581-3p hsa-miR-10b-3p hsa-miR-6513-5p hsa-miR-5100 hsa-miR-548ar-5p hsa-miR-1305 hsa-miR-6852-5p hsa-miR-6870-3p hsa-miR-548i hsa-miR-4483 hsa-miR-148a-3p hsa-miR-6851-3p hsa-miR-129-2-3p hsa-miR-7156-3p hsa-miR-5001-3p hsa-miR-1273h-3p hsa-miR-2115-3p |

|       |     |                                                                                                                                                                                                                                                                                                                                                                                                                                                                                                                                                                                                                                                                                                                                                                                                                                                                                                                                                                                                                                                                                                                                                                                                                                                                                                                                                                                                                                                                                                                                                                                                                                                                                                                                                                                                                                                                                                                                                                                                                                                                                                                                                                                                                                                                                                                                                                                                                                                                                                                                                                                                                                     |
|-------|-----|-------------------------------------------------------------------------------------------------------------------------------------------------------------------------------------------------------------------------------------------------------------------------------------------------------------------------------------------------------------------------------------------------------------------------------------------------------------------------------------------------------------------------------------------------------------------------------------------------------------------------------------------------------------------------------------------------------------------------------------------------------------------------------------------------------------------------------------------------------------------------------------------------------------------------------------------------------------------------------------------------------------------------------------------------------------------------------------------------------------------------------------------------------------------------------------------------------------------------------------------------------------------------------------------------------------------------------------------------------------------------------------------------------------------------------------------------------------------------------------------------------------------------------------------------------------------------------------------------------------------------------------------------------------------------------------------------------------------------------------------------------------------------------------------------------------------------------------------------------------------------------------------------------------------------------------------------------------------------------------------------------------------------------------------------------------------------------------------------------------------------------------------------------------------------------------------------------------------------------------------------------------------------------------------------------------------------------------------------------------------------------------------------------------------------------------------------------------------------------------------------------------------------------------------------------------------------------------------------------------------------------------|
|       |     | <p> hsa-miR-7152-5p hsa-miR-7855-5p hsa-miR-548as-5p hsa-miR-4764-5p hsa-miR-134-3p hsa-miR-936 hsa-miR-2861 hsa-miR-5190 hsa-miR-6835-5p hsa-miR-496.1 hsa-miR-449b-5p hsa-miR-548w hsa-miR-3913-5p hsa-miR-3616-5p hsa-miR-7107-3p hsa-miR-93-3p hsa-miR-450b-3p hsa-miR-6894-5p hsa-miR-4792 hsa-miR-6753-3p hsa-miR-299-3p hsa-miR-25-5p hsa-miR-6823-5p hsa-miR-548bb-5p hsa-miR-1255a hsa-miR-3973 hsa-miR-548au-5p hsa-miR-4727-5p hsa-miR-221-5p hsa-miR-891a-3p hsa-miR-619-5p hsa-miR-605-5p hsa-miR-4720-5p hsa-miR-5684 hsa-miR-4446-3p hsa-miR-4298 hsa-miR-4776-5p hsa-miR-199a-3p hsa-miR-4769-3p hsa-miR-6764-5p hsa-miR-548ab hsa-miR-548y hsa-miR-34a-5p hsa-miR-4425 hsa-miR-7843-3p hsa-miR-6728-3p hsa-miR-3136-5p hsa-miR-4771 hsa-miR-199b-3p hsa-miR-3150a-3p hsa-miR-4770 hsa-miR-4658 hsa-miR-6071 hsa-miR-6742-3p hsa-miR-6790-5p hsa-miR-3614-3p hsa-miR-574-5p hsa-miR-4657 hsa-miR-296-3p hsa-miR-877-3p hsa-miR-6087 hsa-miR-487b-5p hsa-miR-649 hsa-miR-205-3p hsa-miR-4800-5p hsa-miR-6817-5p hsa-miR-1302 hsa-miR-514b-3p hsa-miR-1293 hsa-miR-4502 </p>                                                                                                                                                                                                                                                                                                                                                                                                                                                                                                                                                                                                                                                                                                                                                                                                                                                                                                                                                                                                                                                                                                                                                                                                                                                                                                                                                                                                                                                                                                                                          |
| SRC-2 | 354 | <p> hsa-miR-576-3p hsa-miR-2682-5p hsa-miR-487a-3p hsa-miR-34b-5p hsa-miR-381-3p hsa-miR-374b-3p hsa-miR-3681-5p hsa-miR-548s hsa-miR-3187-3p hsa-miR-3155a hsa-miR-4328 hsa-miR-2114-3p hsa-miR-3120-3p hsa-miR-138-1-3p hsa-miR-675-3p hsa-miR-4732-5p hsa-miR-7162-5p hsa-miR-8060 hsa-miR-4421 hsa-miR-4486 hsa-miR-1179 hsa-miR-3672 hsa-let-7a-3p hsa-miR-532-3p hsa-miR-3653-5p hsa-miR-202-5p hsa-miR-516a-3p hsa-miR-575 hsa-miR-6515-5p hsa-miR-375 hsa-miR-627-5p hsa-miR-3618 hsa-miR-664b-5p hsa-miR-302c-5p hsa-miR-3202 hsa-miR-124-3p.1 hsa-miR-3910 hsa-let-7b-3p hsa-miR-6878-5p hsa-miR-885-5p hsa-miR-4715-3p hsa-miR-6799-5p hsa-miR-3677-5p hsa-miR-7848-3p hsa-miR-342-3p hsa-miR-5587-5p hsa-miR-4326 hsa-miR-1231 hsa-miR-199a-5p hsa-miR-5680 hsa-miR-3682-3p hsa-miR-657 hsa-miR-9500 hsa-miR-136-3p hsa-miR-876-5p hsa-miR-4419b hsa-miR-7150 hsa-miR-3689a-5p hsa-miR-1228-3p hsa-miR-4744 hsa-miR-5006-5p hsa-miR-3678-3p hsa-miR-4711-3p hsa-miR-503-3p hsa-miR-3680-3p hsa-miR-7112-5p hsa-miR-6772-5p hsa-miR-4680-5p hsa-miR-504-5p.1 hsa-miR-4678 hsa-miR-5708 hsa-miR-660-3p hsa-miR-1202 hsa-miR-3160-5p hsa-miR-6715b-3p hsa-miR-6864-3p hsa-miR-216b-3p hsa-miR-6837-3p hsa-miR-4263 hsa-miR-214-5p hsa-miR-495-5p hsa-miR-643 hsa-miR-4735-5p hsa-miR-3162-5p hsa-miR-6893-5p hsa-miR-4539 hsa-miR-4717-3p hsa-miR-6854-5p hsa-miR-509-3p hsa-miR-4722-3p hsa-miR-124-3p.2 hsa-miR-4292 hsa-miR-4650-5p hsa-miR-3617-3p hsa-miR-2681-5p hsa-miR-3613-5p hsa-miR-5096 hsa-miR-6808-5p hsa-miR-6837-5p hsa-miR-98-3p hsa-miR-6743-5p hsa-miR-154-3p hsa-miR-4774-3p hsa-miR-516b-3p hsa-miR-7705 hsa-miR-3972 hsa-miR-153-3p hsa-miR-331-5p hsa-miR-31-5p hsa-miR-3924 hsa-miR-6508-3p hsa-miR-5193 hsa-miR-139-3p hsa-miR-651-5p hsa-miR-6826-3p hsa-miR-2681-3p hsa-miR-6858-3p hsa-miR-6073 hsa-miR-4711-5p hsa-miR-6730-5p hsa-miR-3650 hsa-miR-4789-5p hsa-miR-4686 hsa-miR-208a-5p hsa-miR-4478 hsa-miR-4307 hsa-miR-139-5p hsa-miR-301a-5p hsa-miR-155-3p hsa-miR-103a-3p hsa-miR-383-3p hsa-miR-199b-5p hsa-miR-8062 hsa-miR-8079 hsa-miR-759 hsa-miR-1915-5p hsa-miR-6789-5p hsa-miR-4745-5p hsa-miR-6511b-5p hsa-miR-144-3p hsa-miR-374a-3p hsa-miR-7515 hsa-miR-5007-3p hsa-miR-6823-3p hsa-miR-218-5p hsa-miR-6820-3p hsa-miR-208b-5p hsa-miR-3064-3p hsa-miR-136-5p hsa-miR-3689e hsa-miR-3689f hsa-miR-4272 hsa-miR-632 hsa-miR-101-3p.1 hsa-miR-556-3p hsa-miR-4289 hsa-miR-3668 hsa-miR-499b-5p hsa-miR-3184-3p hsa-miR-29b-1-5p hsa-miR-4526 hsa-miR-3164 hsa-miR-6514-3p hsa-miR-4736 hsa-miR-140-3p.2 hsa-miR-4474-5p hsa-miR-1537-3p hsa-miR-6884-3p hsa-miR-3606-5p </p> |

|       |     |                                                                                                                                                                                                                                                                                                                                                                                                                                                                                                                                                                                                                                                                                                                                                                                                                                                                                                                                                                                                                                                                                                                                                                                                                                                                                                                                                                                                                                                                                                                                                                                                                                                                                                                                                                                                                                                                                                                                                                                                                                                                                                                                                                                                                                                                                                                                                                                                                                                                                                                                                                                                                                                                                                                                                                                                                                                                           |
|-------|-----|---------------------------------------------------------------------------------------------------------------------------------------------------------------------------------------------------------------------------------------------------------------------------------------------------------------------------------------------------------------------------------------------------------------------------------------------------------------------------------------------------------------------------------------------------------------------------------------------------------------------------------------------------------------------------------------------------------------------------------------------------------------------------------------------------------------------------------------------------------------------------------------------------------------------------------------------------------------------------------------------------------------------------------------------------------------------------------------------------------------------------------------------------------------------------------------------------------------------------------------------------------------------------------------------------------------------------------------------------------------------------------------------------------------------------------------------------------------------------------------------------------------------------------------------------------------------------------------------------------------------------------------------------------------------------------------------------------------------------------------------------------------------------------------------------------------------------------------------------------------------------------------------------------------------------------------------------------------------------------------------------------------------------------------------------------------------------------------------------------------------------------------------------------------------------------------------------------------------------------------------------------------------------------------------------------------------------------------------------------------------------------------------------------------------------------------------------------------------------------------------------------------------------------------------------------------------------------------------------------------------------------------------------------------------------------------------------------------------------------------------------------------------------------------------------------------------------------------------------------------------------|
|       |     | <p> hsa-miR-3147 hsa-miR-5700 hsa-miR-3152-5p hsa-miR-4275 hsa-miR-4754 hsa-miR-4306 hsa-miR-3689b-5p hsa-miR-3918 hsa-miR-185-5p hsa-miR-888-5p hsa-miR-181c-3p hsa-miR-624-3p hsa-miR-6890-5p hsa-miR-875-5p hsa-miR-942-3p hsa-miR-1245a hsa-miR-3118 hsa-miR-4531 hsa-miR-6892-3p hsa-miR-1290 hsa-miR-7154-5p hsa-miR-6513-3p hsa-miR-28-3p hsa-miR-4640-5p hsa-miR-196a-5p hsa-miR-6516-5p hsa-miR-3146 hsa-miR-510-5p hsa-miR-4726-5p hsa-miR-4644 hsa-miR-301b-5p hsa-miR-6716-5p hsa-miR-6889-5p hsa-miR-589-3p hsa-miR-4685-5p hsa-miR-6853-3p hsa-miR-6780b-3p hsa-miR-4528 hsa-miR-2116-3p hsa-miR-6895-5p hsa-miR-134-5p hsa-miR-7157-3p hsa-miR-323a-3p hsa-miR-3065-3p hsa-miR-3143 hsa-miR-196b-5p hsa-miR-6509-5p hsa-miR-6791-5p hsa-miR-6850-5p hsa-miR-6889-3p hsa-miR-587 hsa-miR-1303 hsa-miR-1304-5p hsa-miR-142-3p.1 hsa-miR-8087 hsa-miR-3137 hsa-miR-1185-2-3p hsa-miR-4794 hsa-miR-3685 hsa-miR-6727-3p hsa-miR-1273e hsa-miR-337-3p hsa-miR-660-5p hsa-miR-3660 hsa-miR-378g hsa-miR-6894-3p hsa-miR-521 hsa-miR-3155b hsa-miR-590-5p hsa-miR-106b-3p hsa-miR-2113 hsa-miR-6736-3p hsa-miR-942-5p hsa-miR-622 hsa-miR-6739-3p hsa-miR-3177-5p hsa-miR-6760-5p hsa-miR-506-3p hsa-miR-6811-5p hsa-miR-31-3p hsa-miR-7113-3p hsa-miR-203a-3p.1 hsa-miR-1286 hsa-miR-101-3p.2 hsa-miR-873-5p.2 hsa-miR-3675-5p hsa-miR-484 hsa-miR-4701-5p hsa-miR-6777-5p hsa-miR-204-3p hsa-miR-96-3p hsa-miR-4676-5p hsa-miR-4688 hsa-miR-6865-3p hsa-miR-1178-3p hsa-miR-3944-5p hsa-miR-7852-3p hsa-miR-34c-3p hsa-miR-1253 hsa-miR-4646-5p hsa-miR-520f-5p hsa-miR-4712-3p hsa-miR-4481 hsa-miR-20b-3p hsa-miR-5188 hsa-miR-6719-3p hsa-miR-2115-5p hsa-miR-4662a-5p hsa-miR-561-5p hsa-miR-3158-3p hsa-miR-6753-5p hsa-miR-940 hsa-miR-4653-5p hsa-miR-588 hsa-miR-1261 hsa-miR-1251-5p hsa-miR-449c-5p hsa-miR-5087 hsa-miR-6735-3p hsa-miR-548av-3p hsa-miR-5701 hsa-miR-4704-5p hsa-miR-3152-3p hsa-miR-6834-5p hsa-miR-934 hsa-miR-548b-3p hsa-miR-1322 hsa-miR-148a-5p hsa-miR-609 hsa-miR-4440 hsa-let-7f-2-3p hsa-miR-3167 hsa-miR-4660 hsa-miR-1292-5p hsa-miR-3144-3p hsa-let-7f-1-3p hsa-miR-100-3p hsa-miR-1227-3p hsa-miR-6843-3p hsa-miR-3929 hsa-miR-1256 hsa-miR-4755-3p hsa-miR-3921 hsa-miR-6737-3p hsa-miR-4435 hsa-miR-664a-5p hsa-miR-466 hsa-miR-6848-3p hsa-miR-4288 hsa-miR-6747-3p hsa-miR-374c-3p hsa-miR-1264 hsa-miR-6830-3p hsa-miR-5699-3p hsa-miR-382-5p hsa-miR-6849-5p hsa-miR-107 hsa-miR-5003-5p hsa-miR-5010-3p hsa-miR-300 hsa-miR-4733-3p hsa-miR-4475 hsa-miR-3940-3p hsa-miR-218-2-3p hsa-miR-212-5p hsa-miR-889-3p hsa-miR-15a-3p hsa-miR-1226-5p hsa-miR-3665 hsa-miR-4423-3p hsa-miR-5008-3p hsa-miR-6752-3p hsa-miR-346 hsa-miR-21-5p hsa-miR-4786-5p hsa-miR-1185-1-3p hsa-miR-6846-3p hsa-miR-8065 hsa-miR-4252 hsa-miR-552-5p hsa-miR-3159 hsa-miR-433-3p hsa-miR-6830-5p hsa-miR-1976 hsa-miR-4687-5p </p> |
| SRC-3 | 354 | <p> hsa-miR-520f-3p hsa-miR-1298-5p hsa-miR-30d-5p hsa-miR-4493 hsa-miR-520b hsa-miR-7159-5p hsa-miR-4524b-3p hsa-miR-17-5p hsa-miR-6895-3p hsa-miR-6873-5p hsa-miR-3200-5p hsa-miR-302b-3p hsa-miR-5089-3p hsa-miR-648 hsa-miR-4695-3p hsa-miR-6793-3p hsa-miR-541-5p hsa-miR-1276 hsa-miR-519b-3p hsa-miR-4641 hsa-miR-193a-5p hsa-miR-4534 hsa-miR-4474-3p hsa-miR-500a-5p hsa-miR-758-3p hsa-miR-4274 hsa-miR-3150b-3p hsa-miR-6858-5p hsa-miR-4797-3p hsa-miR-4650-3p hsa-miR-593-3p hsa-miR-320c hsa-miR-6818-3p hsa-miR-6504-5p hsa-miR-4708-3p hsa-miR-4748 hsa-miR-4302 hsa-miR-4436a hsa-miR-486-3p hsa-miR-6511a-3p hsa-miR-5583-5p hsa-miR-3619-5p hsa-miR-3689d hsa-miR-200a-5p hsa-miR-302e hsa-miR-302a-5p hsa-miR-7155-5p hsa-miR-544b hsa-miR-4633-3p hsa-miR-3938 hsa-miR-7112-3p hsa-miR-938 hsa-miR-3074-3p hsa-miR-329-5p hsa-miR-372-3p hsa-miR-30a-5p hsa-miR- </p>                                                                                                                                                                                                                                                                                                                                                                                                                                                                                                                                                                                                                                                                                                                                                                                                                                                                                                                                                                                                                                                                                                                                                                                                                                                                                                                                                                                                                                                                                                                                                                                                                                                                                                                                                                                                                                                                                                                                                                                |

|  |  |                                                                                                                                                                                                                                                                                                                                                                                                                                                                                                                                                                                                                                                                                                                                                                                                                                                                                                                                                                                                                                                                                                                                                                                                                                                                                                                                                                                                                                                                                                                                                                                                                                                                                                                                                                                                                                                                                                                                                                                                                                                                                                                                                                                                                                                                                                                                                                                                                                                                                                                                                                                                                                                                                                                                                                                                                                                                                                                                                                                                                                                                                                                                                                                                                                                                                                                                                                                                                                                                                                                                                                                                                                                                                                                                                           |
|--|--|-----------------------------------------------------------------------------------------------------------------------------------------------------------------------------------------------------------------------------------------------------------------------------------------------------------------------------------------------------------------------------------------------------------------------------------------------------------------------------------------------------------------------------------------------------------------------------------------------------------------------------------------------------------------------------------------------------------------------------------------------------------------------------------------------------------------------------------------------------------------------------------------------------------------------------------------------------------------------------------------------------------------------------------------------------------------------------------------------------------------------------------------------------------------------------------------------------------------------------------------------------------------------------------------------------------------------------------------------------------------------------------------------------------------------------------------------------------------------------------------------------------------------------------------------------------------------------------------------------------------------------------------------------------------------------------------------------------------------------------------------------------------------------------------------------------------------------------------------------------------------------------------------------------------------------------------------------------------------------------------------------------------------------------------------------------------------------------------------------------------------------------------------------------------------------------------------------------------------------------------------------------------------------------------------------------------------------------------------------------------------------------------------------------------------------------------------------------------------------------------------------------------------------------------------------------------------------------------------------------------------------------------------------------------------------------------------------------------------------------------------------------------------------------------------------------------------------------------------------------------------------------------------------------------------------------------------------------------------------------------------------------------------------------------------------------------------------------------------------------------------------------------------------------------------------------------------------------------------------------------------------------------------------------------------------------------------------------------------------------------------------------------------------------------------------------------------------------------------------------------------------------------------------------------------------------------------------------------------------------------------------------------------------------------------------------------------------------------------------------------------------------|
|  |  | <p>6844 hsa-miR-623 hsa-miR-4689 hsa-miR-519a-3p hsa-miR-621 hsa-miR-4664-5p hsa-miR-4291 hsa-miR-1271-3p hsa-miR-496.2 hsa-miR-491-5p hsa-miR-302c-3p.2 hsa-miR-3670 hsa-miR-4286 hsa-miR-6887-3p hsa-miR-196a-3p hsa-miR-3153 hsa-miR-548ba hsa-miR-8080 hsa-miR-1912 hsa-miR-4316 hsa-miR-302c-3p.1 hsa-miR-203a-5p hsa-miR-4717-5p hsa-miR-20b-5p hsa-miR-4297 hsa-miR-3065-5p hsa-miR-6822-3p hsa-miR-323b-3p hsa-miR-4784 hsa-miR-4418 hsa-miR-4640-3p hsa-miR-106b-5p hsa-miR-4712-5p hsa-miR-504-3p hsa-miR-379-5p hsa-miR-6069 hsa-miR-4511 hsa-miR-580-5p hsa-miR-20a-5p hsa-miR-106a-5p hsa-miR-188-3p hsa-miR-550b-2-5p hsa-miR-6859-5p hsa-miR-2117 hsa-miR-548u hsa-miR-6801-5p hsa-miR-4638-3p hsa-miR-6808-3p hsa-miR-141-5p hsa-miR-4676-3p hsa-miR-4756-3p hsa-miR-6871-5p hsa-miR-6821-3p hsa-miR-520c-3p hsa-miR-518a-5p hsa-miR-770-5p hsa-miR-6817-3p hsa-miR-200b-5p hsa-miR-3157-3p hsa-miR-5195-5p hsa-miR-4280 hsa-miR-1294 hsa-miR-7158-5p hsa-miR-3168 hsa-miR-6874-5p hsa-miR-302a-3p hsa-miR-4299 hsa-miR-512-3p hsa-miR-7110-3p hsa-miR-4536-5p hsa-miR-4760-5p hsa-miR-935 hsa-miR-541-3p hsa-miR-4503 hsa-miR-4999-3p hsa-miR-497-3p hsa-miR-8082 hsa-miR-4662b hsa-miR-371a-5p hsa-miR-4642 hsa-miR-4724-3p hsa-miR-4524a-3p hsa-miR-30b-5p hsa-miR-4429 hsa-miR-330-5p hsa-miR-571 hsa-miR-3160-3p hsa-miR-548ag hsa-miR-7152-3p hsa-miR-3125 hsa-miR-342-5p hsa-miR-4696 hsa-miR-527 hsa-miR-224-5p hsa-miR-29c-3p hsa-miR-3616-3p hsa-miR-4311 hsa-miR-30e-5p hsa-miR-7161-5p hsa-miR-411-5p.2 hsa-miR-3117-5p hsa-miR-1279 hsa-miR-93-5p hsa-miR-4452 hsa-miR-654-5p hsa-miR-6866-3p hsa-miR-6511b-3p hsa-miR-7158-3p hsa-miR-6734-3p hsa-miR-6068 hsa-miR-24-1-5p hsa-miR-5584-3p hsa-miR-4424 hsa-miR-6812-5p hsa-miR-6851-5p hsa-miR-876-3p hsa-miR-211-5p hsa-miR-509-5p hsa-miR-767-5p hsa-miR-219a-1-3p hsa-miR-6134 hsa-miR-132-3p hsa-miR-514a-5p hsa-miR-3190-5p hsa-miR-6756-5p hsa-miR-595 hsa-miR-7854-3p hsa-miR-552-3p hsa-miR-570-5p hsa-miR-4646-3p hsa-miR-3529-5p hsa-miR-1285-5p hsa-miR-3919 hsa-miR-3916 hsa-miR-3064-5p hsa-miR-509-3-5p hsa-miR-522-3p hsa-miR-373-3p hsa-miR-4755-5p hsa-miR-500b-5p hsa-miR-6807-3p hsa-miR-922 hsa-miR-6766-5p hsa-miR-5581-5p hsa-miR-411-5p.1 hsa-miR-4778-5p hsa-miR-892c-3p hsa-miR-6507-3p hsa-miR-6130 hsa-miR-3907 hsa-miR-561-3p hsa-miR-6512-5p hsa-miR-526b-3p hsa-miR-4426 hsa-miR-1273g-5p hsa-miR-4663 hsa-miR-4419a hsa-miR-520a-3p hsa-miR-4520-3p hsa-miR-6888-3p hsa-miR-629-5p hsa-miR-6733-5p hsa-miR-625-3p hsa-miR-6861-5p hsa-miR-8061 hsa-miR-519c-3p hsa-miR-4487 hsa-miR-1295b-3p hsa-miR-217 hsa-miR-892b hsa-miR-7159-3p hsa-miR-3136-3p hsa-miR-1288-3p hsa-miR-4672 hsa-miR-15b-3p hsa-miR-3934-3p hsa-miR-30c-5p hsa-miR-4649-3p hsa-miR-6804-3p hsa-miR-193b-5p hsa-miR-7155-3p hsa-miR-550a-5p hsa-miR-6129 hsa-miR-548p hsa-miR-4687-3p hsa-miR-519d-3p hsa-miR-6806-5p hsa-miR-29b-3p hsa-miR-4451 hsa-miR-7974 hsa-miR-6768-5p hsa-miR-302f hsa-miR-550b-3p hsa-miR-606 hsa-miR-1178-5p hsa-miR-518c-5p hsa-miR-1468-5p hsa-miR-5192 hsa-miR-4433a-3p hsa-miR-4324 hsa-miR-3135a hsa-miR-5571-3p hsa-miR-4779 hsa-miR-3145-3p hsa-miR-676-5p hsa-miR-29a-3p hsa-miR-550a-3-5p hsa-miR-3663-3p hsa-miR-6831-3p hsa-miR-320d hsa-miR-6824-3p hsa-miR-4464 hsa-miR-6769b-5p hsa-miR-1277-3p hsa-miR-1243 hsa-miR-761 hsa-miR-149-5p hsa-miR-4318 hsa-miR-4490 hsa-miR-616-3p hsa-miR-212-3p hsa-miR-6764-3p hsa-miR-505-3p.2 hsa-miR-4468 hsa-miR-224-3p hsa-miR-520d-3p hsa-miR-6747-5p hsa-miR-4790-3p hsa-miR-452-5p hsa-miR-6737-5p hsa-miR-642a-5p hsa-miR-3156-5p hsa-miR-520e hsa-miR-580-3p hsa-miR-6739-5p hsa-miR-3667-3p hsa-miR-4716-5p hsa-miR-7975 hsa-miR-1295b-5p hsa-miR-6838-3p hsa-miR-215-5p hsa-</p> |
|--|--|-----------------------------------------------------------------------------------------------------------------------------------------------------------------------------------------------------------------------------------------------------------------------------------------------------------------------------------------------------------------------------------------------------------------------------------------------------------------------------------------------------------------------------------------------------------------------------------------------------------------------------------------------------------------------------------------------------------------------------------------------------------------------------------------------------------------------------------------------------------------------------------------------------------------------------------------------------------------------------------------------------------------------------------------------------------------------------------------------------------------------------------------------------------------------------------------------------------------------------------------------------------------------------------------------------------------------------------------------------------------------------------------------------------------------------------------------------------------------------------------------------------------------------------------------------------------------------------------------------------------------------------------------------------------------------------------------------------------------------------------------------------------------------------------------------------------------------------------------------------------------------------------------------------------------------------------------------------------------------------------------------------------------------------------------------------------------------------------------------------------------------------------------------------------------------------------------------------------------------------------------------------------------------------------------------------------------------------------------------------------------------------------------------------------------------------------------------------------------------------------------------------------------------------------------------------------------------------------------------------------------------------------------------------------------------------------------------------------------------------------------------------------------------------------------------------------------------------------------------------------------------------------------------------------------------------------------------------------------------------------------------------------------------------------------------------------------------------------------------------------------------------------------------------------------------------------------------------------------------------------------------------------------------------------------------------------------------------------------------------------------------------------------------------------------------------------------------------------------------------------------------------------------------------------------------------------------------------------------------------------------------------------------------------------------------------------------------------------------------------------------------------|

|  |  |                                                                                                                                                                                                                                                                                                                                                                                                                                                                                                                                                                                                                                                                                                                                                                                                                                                                      |
|--|--|----------------------------------------------------------------------------------------------------------------------------------------------------------------------------------------------------------------------------------------------------------------------------------------------------------------------------------------------------------------------------------------------------------------------------------------------------------------------------------------------------------------------------------------------------------------------------------------------------------------------------------------------------------------------------------------------------------------------------------------------------------------------------------------------------------------------------------------------------------------------|
|  |  | miR-6127 hsa-miR-6758-3p hsa-miR-6133 hsa-miR-4510 hsa-miR-583 hsa-miR-760 hsa-miR-6777-3p hsa-miR-323a-5p hsa-miR-877-5p hsa-miR-4700-3p hsa-miR-5000-3p hsa-miR-92a-2-5p hsa-miR-1224-3p hsa-miR-4774-5p hsa-miR-6798-3p hsa-miR-1910-5p hsa-miR-3914 hsa-miR-6769a-5p hsa-miR-320a hsa-miR-1225-5p hsa-miR-6819-5p hsa-miR-6749-3p hsa-miR-4647 hsa-miR-7162-3p hsa-miR-3130-3p hsa-miR-6131 hsa-miR-320b hsa-miR-505-5p hsa-miR-4729 hsa-miR-140-3p.1 hsa-miR-3664-5p hsa-miR-192-5p hsa-miR-6080 hsa-miR-6729-3p hsa-miR-5689 hsa-miR-5006-3p hsa-miR-874-3p hsa-miR-3129-3p hsa-miR-376a-5p hsa-miR-188-5p hsa-miR-7978 hsa-miR-6873-3p hsa-miR-4671-3p hsa-miR-204-5p hsa-miR-2054 hsa-miR-548ai hsa-miR-7973 hsa-miR-214-3p hsa-miR-1197 hsa-miR-197-3p hsa-miR-326 hsa-miR-24-2-5p hsa-miR-4780 hsa-miR-2355-5p hsa-miR-6500-5p hsa-miR-558 hsa-miR-302d-3p |
|--|--|----------------------------------------------------------------------------------------------------------------------------------------------------------------------------------------------------------------------------------------------------------------------------------------------------------------------------------------------------------------------------------------------------------------------------------------------------------------------------------------------------------------------------------------------------------------------------------------------------------------------------------------------------------------------------------------------------------------------------------------------------------------------------------------------------------------------------------------------------------------------|



**Table S1.** Binding regions between miR-137 and its putative target genes, SRC-1, SRC-2, and SRC-3 (miRDB).

| Names               | Total | microRNAs                                                                                                                                                                                                                                                                                                                                                                                                                                                                                                                                                                                                                                                                                                                                                                                                                                                                                                                                                                                                                                                                                                                                                                                                                                                                                                                                                                                                                                                                                                                                                                                                                                                                                                                                                                                                                                                                                                                                                                                                                       |
|---------------------|-------|---------------------------------------------------------------------------------------------------------------------------------------------------------------------------------------------------------------------------------------------------------------------------------------------------------------------------------------------------------------------------------------------------------------------------------------------------------------------------------------------------------------------------------------------------------------------------------------------------------------------------------------------------------------------------------------------------------------------------------------------------------------------------------------------------------------------------------------------------------------------------------------------------------------------------------------------------------------------------------------------------------------------------------------------------------------------------------------------------------------------------------------------------------------------------------------------------------------------------------------------------------------------------------------------------------------------------------------------------------------------------------------------------------------------------------------------------------------------------------------------------------------------------------------------------------------------------------------------------------------------------------------------------------------------------------------------------------------------------------------------------------------------------------------------------------------------------------------------------------------------------------------------------------------------------------------------------------------------------------------------------------------------------------|
| SRC-1; SRC-2; SRC-3 | 11    | hsa-miR-8485 hsa-miR-1277-5p hsa-miR-3191-5p hsa-miR-548az-5p hsa-miR-4699-3p hsa-miR-137-3p hsa-miR-3646 hsa-miR-548t-5p hsa-miR-548c-3p hsa-miR-1283.                                                                                                                                                                                                                                                                                                                                                                                                                                                                                                                                                                                                                                                                                                                                                                                                                                                                                                                                                                                                                                                                                                                                                                                                                                                                                                                                                                                                                                                                                                                                                                                                                                                                                                                                                                                                                                                                         |
| SRC-1; SRC-2        | 32    | hsa-miR-23a-3p hsa-miR-513a-3p hsa-miR-4443 hsa-miR-506-5p hsa-miR-548t-3p hsa-miR-3606-3p hsa-miR-4441 hsa-miR-590-3p hsa-miR-10522-5p hsa-miR-23c hsa-miR-4786-3p hsa-miR-23b-3p hsa-miR-548aa hsa-miR-452-3p hsa-miR-4719 hsa-miR-548ap-3p hsa-miR-4670-3p hsa-miR-501-5p hsa-miR-4270 hsa-miR-2467-3p hsa-miR-4279 hsa-miR-6888-5p hsa-miR-4775 hsa-miR-4666a-3p hsa-miR-513c-3p hsa-miR-3679-3p hsa-miR-5580-3p hsa-miR-369-3p hsa-miR-548as-3p hsa-miR-4428 hsa-miR-6809-3p.                                                                                                                                                                                                                                                                                                                                                                                                                                                                                                                                                                                                                                                                                                                                                                                                                                                                                                                                                                                                                                                                                                                                                                                                                                                                                                                                                                                                                                                                                                                                              |
| SRC-1; SRC-3        | 25    | hsa-miR-489-3p hsa-miR-514b-5p hsa-miR-655-3p hsa-miR-875-3p hsa-miR-524-5p hsa-miR-211-3p hsa-miR-5011-5p hsa-miR-4652-3p hsa-miR-4482-3p hsa-miR-4422 hsa-miR-6875-3p hsa-miR-5004-3p hsa-miR-545-3p hsa-miR-4254 hsa-miR-6882-3p hsa-miR-548e-5p hsa-miR-374c-5p hsa-miR-9985 hsa-miR-6507-5p hsa-miR-544a hsa-miR-27b-3p hsa-miR-513c-5p hsa-miR-500a-3p hsa-miR-520d-5p hsa-miR-27a-3p.                                                                                                                                                                                                                                                                                                                                                                                                                                                                                                                                                                                                                                                                                                                                                                                                                                                                                                                                                                                                                                                                                                                                                                                                                                                                                                                                                                                                                                                                                                                                                                                                                                    |
| SRC-2; SRC-3        | 25    | hsa-miR-7-2-3p hsa-miR-9-5p hsa-miR-7-1-3p hsa-miR-3662 hsa-miR-3613-3p hsa-miR-548m hsa-miR-766-3p hsa-miR-5787 hsa-miR-510-3p hsa-miR-200c-3p hsa-miR-200b-3p hsa-miR-3925-3p hsa-miR-12136 hsa-miR-4762-3p hsa-miR-520g-3p hsa-miR-6839-3p hsa-miR-216b-5p hsa-miR-429 hsa-miR-4668-3p hsa-miR-3913-3p hsa-miR-520h hsa-miR-186-5p hsa-miR-4738-3p hsa-miR-5582-3p hsa-miR-1252-3p.                                                                                                                                                                                                                                                                                                                                                                                                                                                                                                                                                                                                                                                                                                                                                                                                                                                                                                                                                                                                                                                                                                                                                                                                                                                                                                                                                                                                                                                                                                                                                                                                                                          |
| SRC-1               | 137   | hsa-miR-140-5p hsa-miR-3622b-3p hsa-miR-889-5p hsa-miR-5698 hsa-miR-222-5p hsa-miR-103a-2-5p hsa-miR-377-5p hsa-miR-650 hsa-miR-3622a-3p hsa-miR-3681-3p hsa-miR-4635 hsa-miR-18b-5p hsa-miR-18a-5p hsa-miR-216a-3p hsa-miR-374a-5p hsa-miR-2278 hsa-miR-892c-5p hsa-miR-493-3p hsa-miR-34a-3p hsa-miR-647 hsa-miR-4668-5p hsa-miR-496 hsa-miR-7853-5p hsa-miR-661 hsa-miR-493-5p hsa-miR-3074-5p hsa-miR-6825-5p hsa-miR-4735-3p hsa-miR-1238-3p hsa-miR-3908 hsa-miR-5584-5p hsa-miR-6815-3p hsa-miR-1-3p hsa-miR-129-5p hsa-miR-3942-5p hsa-miR-182-5p hsa-miR-103a-1-5p hsa-miR-6886-3p hsa-miR-551b-5p hsa-miR-1915-3p hsa-miR-3612 hsa-miR-6804-3p hsa-miR-653-3p hsa-miR-10b-3p hsa-miR-12123 hsa-miR-548ay-3p hsa-miR-6852-5p hsa-miR-320e hsa-miR-26b-3p hsa-miR-148a-3p hsa-miR-5692c hsa-miR-5001-3p hsa-miR-1273h-3p hsa-miR-2115-3p hsa-miR-7152-5p hsa-miR-1255b-5p hsa-miR-670-3p hsa-miR-5093 hsa-miR-6128 hsa-miR-6782-5p hsa-miR-148b-3p hsa-miR-301a-3p hsa-miR-936 hsa-miR-152-3p hsa-miR-1233-3p hsa-miR-2861 hsa-miR-2277-3p hsa-miR-6757-3p hsa-miR-708-3p hsa-miR-374b-5p hsa-miR-4509 hsa-miR-9983-3p hsa-miR-508-3p hsa-miR-519d-5p hsa-miR-3059-5p hsa-miR-93-3p hsa-miR-3129-5p hsa-miR-7847-3p hsa-miR-3182 hsa-miR-5692b hsa-miR-488-5p hsa-miR-4778-3p hsa-miR-376c-3p hsa-miR-1255a hsa-miR-1468-3p hsa-miR-12128 hsa-miR-6780a-3p hsa-miR-4728-3p hsa-miR-548at-3p hsa-miR-1914-5p hsa-miR-4704-3p hsa-miR-128-3p hsa-miR-4708-5p hsa-miR-7151-5p hsa-miR-6757-5p hsa-miR-4703-5p hsa-miR-7114-5p hsa-miR-301b-3p hsa-miR-105-5p hsa-miR-199a-3p hsa-miR-6764-5p hsa-miR-7111-5p hsa-miR-7843-3p hsa-miR-4766-3p hsa-miR-1299 hsa-miR-3666 hsa-miR-3922-5p hsa-miR-2053 hsa-miR-4330 hsa-miR-130b-3p hsa-miR-377-3p hsa-miR-6783-3p hsa-miR-6772-3p hsa-miR-199b-3p hsa-miR-6165 hsa-miR-454-3p hsa-miR-1250-3p hsa-miR-206 hsa-miR-4295 hsa-miR-6728-5p hsa-miR-6071 hsa-miR-6870-5p hsa-miR-3614-3p hsa-miR-3121-5p hsa-miR-1343-3p hsa-miR-3166 hsa-miR-877-3p hsa-miR-6738-3p hsa-miR-6086 |

| Names | Total | microRNAs                                                                                                                                                                                                                                                                                                                                                                                                                                                                                                                                                                                                                                                                                                                                                                                                                                                                                                                                                                                                                                                                                                                                                                                                                                                                                                                                                                                                                                                                                                                                                                                                                                                                                                                                                                                                                                                                                                                                                                                                                                                                                                                                                                                                                                                                                                                                                                                                                                                                                                                                                                                                                                                                                                                                                                                                                                                                                                                                                                                                                                                                                                                                                                                                                                                                                                                                                                                                                     |
|-------|-------|-------------------------------------------------------------------------------------------------------------------------------------------------------------------------------------------------------------------------------------------------------------------------------------------------------------------------------------------------------------------------------------------------------------------------------------------------------------------------------------------------------------------------------------------------------------------------------------------------------------------------------------------------------------------------------------------------------------------------------------------------------------------------------------------------------------------------------------------------------------------------------------------------------------------------------------------------------------------------------------------------------------------------------------------------------------------------------------------------------------------------------------------------------------------------------------------------------------------------------------------------------------------------------------------------------------------------------------------------------------------------------------------------------------------------------------------------------------------------------------------------------------------------------------------------------------------------------------------------------------------------------------------------------------------------------------------------------------------------------------------------------------------------------------------------------------------------------------------------------------------------------------------------------------------------------------------------------------------------------------------------------------------------------------------------------------------------------------------------------------------------------------------------------------------------------------------------------------------------------------------------------------------------------------------------------------------------------------------------------------------------------------------------------------------------------------------------------------------------------------------------------------------------------------------------------------------------------------------------------------------------------------------------------------------------------------------------------------------------------------------------------------------------------------------------------------------------------------------------------------------------------------------------------------------------------------------------------------------------------------------------------------------------------------------------------------------------------------------------------------------------------------------------------------------------------------------------------------------------------------------------------------------------------------------------------------------------------------------------------------------------------------------------------------------------------|
|       |       | hsa-miR-130a-3p hsa-miR-498-5p hsa-miR-22-3p hsa-miR-6124 hsa-miR-613 hsa-miR-4723-5p hsa-miR-4653-3p hsa-miR-1225-3p.                                                                                                                                                                                                                                                                                                                                                                                                                                                                                                                                                                                                                                                                                                                                                                                                                                                                                                                                                                                                                                                                                                                                                                                                                                                                                                                                                                                                                                                                                                                                                                                                                                                                                                                                                                                                                                                                                                                                                                                                                                                                                                                                                                                                                                                                                                                                                                                                                                                                                                                                                                                                                                                                                                                                                                                                                                                                                                                                                                                                                                                                                                                                                                                                                                                                                                        |
| SRC-2 | 223   | hsa-miR-8081 hsa-miR-5197-3p hsa-miR-522-5p hsa-miR-518d-5p hsa-miR-381-3p hsa-miR-4306 hsa-miR-3918 hsa-miR-365b-5p hsa-miR-185-5p hsa-miR-873-5p hsa-miR-448 hsa-miR-4477b hsa-miR-3940-5p hsa-miR-4768-5p hsa-miR-548o-3p hsa-miR-4777-3p hsa-miR-6529-5p hsa-miR-335-3p hsa-miR-875-5p hsa-miR-1245a hsa-miR-1290 hsa-miR-7154-5p hsa-miR-6780b-5p hsa-miR-6831-5p hsa-miR-4659a-3p hsa-miR-3611 hsa-miR-1179 hsa-let-7a-3p hsa-miR-10527-5p hsa-miR-3146 hsa-miR-4325 hsa-miR-4644 hsa-miR-4463 hsa-miR-3134 hsa-miR-518e-5p hsa-miR-589-3p hsa-miR-597-3p hsa-miR-4477a hsa-miR-4722-5p hsa-miR-627-5p hsa-miR-4685-5p hsa-miR-3618 hsa-miR-181d-5p hsa-miR-6508-5p hsa-miR-2116-3p hsa-miR-302c-5p hsa-miR-507 hsa-miR-7113-5p hsa-miR-330-3p hsa-miR-4430 hsa-miR-365a-5p hsa-miR-548n hsa-let-7b-3p hsa-miR-3910 hsa-miR-6878-5p hsa-miR-3143 hsa-miR-4494 hsa-miR-4505 hsa-miR-181b-5p hsa-miR-4777-5p hsa-miR-6509-5p hsa-miR-342-3p hsa-miR-5587-5p hsa-miR-8055 hsa-miR-1231 hsa-miR-587 hsa-miR-5680 hsa-miR-4455 hsa-miR-4438 hsa-miR-6880-5p hsa-miR-5003-3p hsa-miR-576-5p hsa-miR-3137 hsa-miR-3692-3p hsa-miR-4659b-3p hsa-miR-5579-3p hsa-miR-4282 hsa-miR-627-3p hsa-miR-5585-5p hsa-miR-4804-3p hsa-miR-3941 hsa-miR-548d-3p hsa-miR-590-5p hsa-miR-523-5p hsa-miR-4262 hsa-miR-4725-3p hsa-miR-3148 hsa-miR-2113 hsa-miR-942-5p hsa-miR-548h-3p hsa-miR-6739-3p hsa-miR-4457 hsa-miR-1207-3p hsa-miR-6760-5p hsa-miR-3680-3p hsa-miR-4680-3p hsa-miR-4720-3p hsa-miR-3160-5p hsa-miR-12135 hsa-miR-3658 hsa-miR-6837-3p hsa-miR-214-5p hsa-miR-383-5p hsa-miR-526a-5p hsa-miR-495-5p hsa-miR-4735-5p hsa-miR-6833-3p hsa-miR-656-3p hsa-miR-520f-5p hsa-miR-6750-3p hsa-miR-5681b hsa-miR-1323 hsa-miR-4521 hsa-miR-561-5p hsa-miR-568 hsa-miR-654-3p hsa-miR-802 hsa-miR-6837-5p hsa-miR-98-3p hsa-miR-1261 hsa-miR-146a-3p hsa-miR-7151-3p hsa-miR-135b-5p hsa-miR-651-3p hsa-miR-125a-3p hsa-miR-548av-3p hsa-miR-7705 hsa-miR-153-3p hsa-miR-5197-5p hsa-miR-4704-5p hsa-miR-4271 hsa-miR-31-5p hsa-miR-3924 hsa-miR-520c-5p hsa-miR-548bb-3p hsa-miR-6818-5p hsa-miR-4766-5p hsa-miR-6782-3p hsa-miR-548b-3p hsa-miR-10397-3p hsa-miR-6754-5p hsa-miR-1322 hsa-miR-6842-3p hsa-miR-148a-5p hsa-miR-1257 hsa-miR-6073 hsa-miR-6730-5p hsa-miR-494-3p hsa-miR-4789-5p hsa-miR-4686 hsa-miR-208a-5p hsa-miR-4307 hsa-miR-451b hsa-miR-937-5p hsa-miR-7856-5p hsa-miR-361-3p hsa-miR-3128 hsa-let-7f-1-3p hsa-miR-5702 hsa-miR-383-3p hsa-miR-1284 hsa-miR-8079 hsa-miR-3185 hsa-miR-4499 hsa-miR-519a-5p hsa-miR-12129 hsa-miR-32-3p hsa-miR-1915-5p hsa-miR-4266 hsa-miR-335-5p hsa-miR-4288 hsa-miR-141-3p hsa-miR-181a-5p hsa-miR-7515 hsa-miR-374c-3p hsa-miR-135a-5p hsa-miR-1264 hsa-miR-208b-5p hsa-miR-518f-5p hsa-miR-9851-5p hsa-miR-6830-3p hsa-miR-8067 hsa-miR-196a-1-3p hsa-miR-629-3p hsa-miR-548z hsa-miR-577 hsa-miR-382-5p hsa-miR-136-5p hsa-miR-218-1-3p hsa-miR-7703 hsa-miR-5010-3p hsa-miR-4804-5p hsa-miR-300 hsa-miR-3120-5p hsa-miR-4507 hsa-miR-4475 hsa-miR-152-5p hsa-miR-181c-5p hsa-miR-3920 hsa-miR-519b-5p hsa-miR-499b-5p hsa-miR-200a-3p hsa-miR-153-5p hsa-miR-944 hsa-miR-548ac hsa-miR-548g-3p hsa-miR-1251-3p hsa-miR-655-5p hsa-miR-519c-5p hsa-miR-6752-3p hsa-miR-21-5p hsa-miR-6885-3p hsa-miR-6734-5p hsa-miR-6514-3p hsa-miR-8065 hsa-miR-3652 hsa-miR-4768-3p hsa-miR-433-3p hsa-miR-891b hsa-miR-9898 hsa-miR-6830-5p hsa-miR-539-5p hsa-miR-3124-3p. |
| SRC-3 | 144   | hsa-miR-1298-5p hsa-miR-30d-5p hsa-miR-3916 hsa-miR-6887-5p hsa-miR-373-3p hsa-miR-548aj-3p hsa-miR-6874-3p hsa-miR-17-5p hsa-miR-548ah-5p hsa-miR-302b-3p hsa-miR-92b-3p hsa-miR-6077 hsa-miR-922 hsa-miR-4695-3p hsa-miR-562 hsa-miR-5581-5p hsa-miR-513a-5p hsa-miR-6515-3p hsa-miR-6499-3p hsa-miR-519b-3p hsa-miR-4534 hsa-miR-26a-2-3p hsa-miR-526b-3p hsa-miR-6511a-5p hsa-miR-363-3p hsa-miR-                                                                                                                                                                                                                                                                                                                                                                                                                                                                                                                                                                                                                                                                                                                                                                                                                                                                                                                                                                                                                                                                                                                                                                                                                                                                                                                                                                                                                                                                                                                                                                                                                                                                                                                                                                                                                                                                                                                                                                                                                                                                                                                                                                                                                                                                                                                                                                                                                                                                                                                                                                                                                                                                                                                                                                                                                                                                                                                                                                                                                         |

| Names | Total | microRNAs                                                                                                                                                                                                                                                                                                                                                                                                                                                                                                                                                                                                                                                                                                                                                                                                                                                                                                                                                                                                                                                                                                                                                                                                                                                                                                                                                                                                                                                                                                                                                                                                                                                                                                                                                                                                                                                                                                                                                 |
|-------|-------|-----------------------------------------------------------------------------------------------------------------------------------------------------------------------------------------------------------------------------------------------------------------------------------------------------------------------------------------------------------------------------------------------------------------------------------------------------------------------------------------------------------------------------------------------------------------------------------------------------------------------------------------------------------------------------------------------------------------------------------------------------------------------------------------------------------------------------------------------------------------------------------------------------------------------------------------------------------------------------------------------------------------------------------------------------------------------------------------------------------------------------------------------------------------------------------------------------------------------------------------------------------------------------------------------------------------------------------------------------------------------------------------------------------------------------------------------------------------------------------------------------------------------------------------------------------------------------------------------------------------------------------------------------------------------------------------------------------------------------------------------------------------------------------------------------------------------------------------------------------------------------------------------------------------------------------------------------------|
|       |       | 520a-3p hsa-miR-4708-3p hsa-miR-4748 hsa-miR-3689d hsa-miR-8061<br>hsa-miR-519c-3p hsa-miR-122b-3p hsa-miR-892b hsa-miR-6805-5p hsa-<br>miR-302e hsa-miR-4753-3p hsa-miR-544b hsa-miR-32-5p hsa-miR-7112-<br>3p hsa-miR-372-3p hsa-miR-30c-5p hsa-miR-3192-3p hsa-miR-30a-5p hsa-<br>miR-3189-3p hsa-miR-6844 hsa-miR-6805-3p hsa-miR-519a-3p hsa-miR-<br>548p hsa-miR-338-5p hsa-miR-5691 hsa-miR-4291 hsa-miR-519d-3p hsa-<br>miR-6806-5p hsa-miR-29b-3p hsa-miR-92a-3p hsa-miR-10523-5p hsa-<br>miR-10393-3p hsa-miR-1468-5p hsa-miR-6733-3p hsa-miR-4796-3p hsa-<br>miR-20b-5p hsa-miR-570-3p hsa-miR-6731-3p hsa-miR-4324 hsa-miR-<br>4297 hsa-miR-29a-3p hsa-miR-520b-3p hsa-miR-106b-5p hsa-miR-6083<br>hsa-miR-1236-3p hsa-miR-3686 hsa-miR-3663-3p hsa-miR-378a-5p hsa-<br>miR-20a-5p hsa-miR-106a-5p hsa-miR-21-3p hsa-miR-6859-5p hsa-miR-<br>3176 hsa-miR-5697 hsa-miR-6801-5p hsa-miR-4464 hsa-miR-5187-3p hsa-<br>miR-1208 hsa-miR-767-3p hsa-miR-1200 hsa-miR-3116 hsa-miR-548ae-3p<br>hsa-miR-520c-3p hsa-miR-33a-5p hsa-miR-3714 hsa-miR-5195-5p hsa-<br>miR-26a-1-3p hsa-miR-302c-3p hsa-miR-3168 hsa-miR-548j-3p hsa-miR-<br>302a-3p hsa-miR-148b-5p hsa-miR-520d-3p hsa-miR-3121-3p hsa-miR-<br>190a-3p hsa-miR-4760-5p hsa-miR-3654 hsa-miR-4503 hsa-miR-6783-5p<br>hsa-miR-548am-3p hsa-miR-4724-3p hsa-miR-30b-5p hsa-miR-4495 hsa-<br>miR-548aw hsa-miR-3609 hsa-miR-548ah-3p hsa-miR-215-5p hsa-miR-<br>3160-3p hsa-miR-4517 hsa-miR-3133 hsa-miR-3125 hsa-miR-4700-3p hsa-<br>miR-1224-3p hsa-miR-145-3p hsa-miR-29c-3p hsa-miR-3914 hsa-miR-<br>520e-3p hsa-miR-10526-3p hsa-miR-30e-5p hsa-miR-1245b-3p hsa-miR-<br>1279 hsa-miR-93-5p hsa-miR-192-5p hsa-miR-3664-5p hsa-miR-4803 hsa-<br>miR-4772-3p hsa-miR-4251 hsa-miR-6734-3p hsa-miR-5584-3p hsa-miR-<br>1910-3p hsa-miR-548aq-3p hsa-miR-6851-5p hsa-miR-3922-3p hsa-miR-<br>767-5p hsa-miR-6795-5p hsa-miR-548x-3p hsa-miR-11399 hsa-miR-302d-<br>3p hsa-miR-33b-5p. |

**Table S2.** Binding regions between miR-137 and its putative target genes, SRC-1, SRC-2, and SRC-3 (miRmap).

| Name                | Total | microRNAs                                                                                                                                                                                                                                                                                                                                                                                                                                                                                                                                                                                                                                                                                                                                                                                                                                                                                                                                                                                                                                                                                                                                                                                                                                                                                                                                                                                                                                                                                                                                                                                                                                                                                                                                                                                                                                                                                                                                                                                                                                                                                                                                                                                                                                                                                                                                                                                                                                                                                                                                                                                                                                                                                                                                                |
|---------------------|-------|----------------------------------------------------------------------------------------------------------------------------------------------------------------------------------------------------------------------------------------------------------------------------------------------------------------------------------------------------------------------------------------------------------------------------------------------------------------------------------------------------------------------------------------------------------------------------------------------------------------------------------------------------------------------------------------------------------------------------------------------------------------------------------------------------------------------------------------------------------------------------------------------------------------------------------------------------------------------------------------------------------------------------------------------------------------------------------------------------------------------------------------------------------------------------------------------------------------------------------------------------------------------------------------------------------------------------------------------------------------------------------------------------------------------------------------------------------------------------------------------------------------------------------------------------------------------------------------------------------------------------------------------------------------------------------------------------------------------------------------------------------------------------------------------------------------------------------------------------------------------------------------------------------------------------------------------------------------------------------------------------------------------------------------------------------------------------------------------------------------------------------------------------------------------------------------------------------------------------------------------------------------------------------------------------------------------------------------------------------------------------------------------------------------------------------------------------------------------------------------------------------------------------------------------------------------------------------------------------------------------------------------------------------------------------------------------------------------------------------------------------------|
| SRC-1; SRC-2; SRC-3 | 62    | <p>hsa-miR-3690 hsa-miR-6499-3p hsa-miR-4659a-3p hsa-miR-4668-5p hsa-miR-661 hsa-miR-499b-3p hsa-miR-4525 hsa-miR-330-3p hsa-let-7g-3p hsa-miR-875-3p hsa-miR-320e hsa-miR-3153 hsa-miR-548d-3p hsa-miR-4725-3p hsa-miR-548h-3p hsa-miR-6128 hsa-miR-5586-5p hsa-miR-579 hsa-miR-605 hsa-miR-6514-5p hsa-miR-548ae hsa-miR-4802-5p hsa-miR-5696 hsa-miR-371a-5p hsa-miR-3646 hsa-miR-548ah-3p hsa-miR-145-3p hsa-miR-5010-5p hsa-miR-373-5p hsa-miR-548aq-3p hsa-miR-425-5p hsa-miR-548ac hsa-miR-625-5p hsa-miR-548x-3p hsa-miR-6514-3p hsa-miR-1254 hsa-miR-548aj-3p hsa-miR-5698 hsa-miR-29b-2-5p hsa-miR-493-5p hsa-miR-616-5p hsa-miR-664b-3p hsa-miR-4659b-3p hsa-miR-489 hsa-miR-3148 hsa-miR-3944-5p hsa-miR-143-5p hsa-miR-3116 hsa-miR-371b-5p hsa-miR-4668-3p hsa-miR-3913-3p hsa-let-7a-2-3p hsa-miR-4271 hsa-miR-4254 hsa-miR-548am-3p hsa-miR-105-5p hsa-miR-499a-3p hsa-miR-548z hsa-miR-137 hsa-miR-6124 hsa-miR-4723-5p hsa-miR-3671</p>                                                                                                                                                                                                                                                                                                                                                                                                                                                                                                                                                                                                                                                                                                                                                                                                                                                                                                                                                                                                                                                                                                                                                                                                                                                                                                                                                                                                                                                                                                                                                                                                                                                                                                                                                                                                |
| SRC-1; SRC-2        | 624   | <p>hsa-miR-576-3p hsa-miR-2682-5p hsa-miR-522-5p hsa-miR-557 hsa-miR-4743-3p hsa-miR-548av-5p hsa-miR-518d-5p hsa-miR-637 hsa-miR-34b-5p hsa-miR-381-3p hsa-miR-4709-3p hsa-miR-374b-3p hsa-miR-17-5p hsa-miR-4674 hsa-miR-448 hsa-miR-515-5p hsa-miR-92b-3p hsa-miR-3140-5p hsa-miR-3940-5p hsa-miR-3680-5p hsa-miR-103a-2-5p hsa-miR-3155a hsa-miR-3977 hsa-miR-377-5p hsa-miR-562 hsa-miR-4328 hsa-miR-6515-3p hsa-miR-3681-3p hsa-miR-520g hsa-miR-5692a hsa-miR-138-1-3p hsa-miR-513b hsa-miR-675-3p hsa-miR-2110 hsa-miR-487a hsa-miR-4486 hsa-miR-2278 hsa-miR-892c-5p hsa-miR-5002-5p hsa-miR-19b-1-5p hsa-miR-26a-2-3p hsa-miR-4677-3p hsa-miR-548ar-3p hsa-miR-202-5p hsa-miR-6511a-5p hsa-miR-548b-5p hsa-miR-4513 hsa-miR-518e-5p hsa-miR-205-5p hsa-miR-496 hsa-miR-6515-5p hsa-miR-6504-5p hsa-miR-4722-5p hsa-miR-4477a hsa-miR-1277-5p hsa-miR-3618 hsa-miR-513a-3p hsa-miR-4799-5p hsa-miR-4735-3p hsa-miR-223-3p hsa-miR-507 hsa-miR-5583-5p hsa-miR-3171 hsa-miR-3908 hsa-miR-186-3p hsa-miR-4257 hsa-miR-10a-3p hsa-miR-5584-5p hsa-miR-6088 hsa-miR-3202 hsa-miR-3149 hsa-miR-551b-5p hsa-miR-603 hsa-miR-4505 hsa-miR-32-5p hsa-miR-5706 hsa-miR-1273f hsa-miR-4777-5p hsa-miR-128 hsa-miR-3074-3p hsa-miR-23a-5p hsa-miR-298 hsa-miR-4326 hsa-miR-3612 hsa-miR-5680 hsa-miR-3682-3p hsa-miR-1207-5p hsa-miR-3189-3p hsa-miR-4438 hsa-miR-939-3p hsa-miR-5003-3p hsa-miR-129-1-3p hsa-miR-4268 hsa-miR-586 hsa-miR-3692-3p hsa-miR-338-5p hsa-miR-4419b hsa-miR-211-3p hsa-miR-200c-3p hsa-miR-6504-3p hsa-miR-4282 hsa-miR-106a-3p hsa-miR-4744 hsa-miR-4652-3p hsa-miR-410 hsa-miR-196a-3p hsa-miR-1285-3p hsa-miR-525-5p hsa-miR-494 hsa-miR-1343 hsa-miR-548az-5p hsa-miR-4690-5p hsa-miR-4717-5p hsa-miR-3678-3p hsa-miR-20b-5p hsa-miR-5692c hsa-miR-1 hsa-miR-4457 hsa-miR-125b-2-3p hsa-miR-3680-3p hsa-miR-548am-5p hsa-miR-2392 hsa-miR-548t-3p hsa-miR-4418 hsa-miR-183-3p hsa-miR-2276 hsa-miR-548f hsa-miR-3119 hsa-miR-3606-3p hsa-miR-106b-5p hsa-miR-569 hsa-miR-149-3p hsa-miR-573 hsa-miR-1236-3p hsa-miR-4680-3p hsa-miR-3686 hsa-miR-4731-3p hsa-miR-3160-5p hsa-miR-378a-5p hsa-miR-519e-5p hsa-miR-20a-5p hsa-miR-106a-5p hsa-miR-2117 hsa-miR-590-3p hsa-miR-5697 hsa-miR-214-5p hsa-miR-4666a-5p hsa-miR-1200 hsa-miR-3199 hsa-miR-4676-3p hsa-miR-2277-3p hsa-miR-3162-5p hsa-miR-4728-5p hsa-miR-4717-3p hsa-miR-518a-5p hsa-miR-509-3p hsa-miR-4496 hsa-miR-4782-5p hsa-miR-4698 hsa-miR-708-3p hsa-miR-33a-5p hsa-miR-4650-5p hsa-miR-1273g-3p hsa-miR-4699-3p hsa-miR-3617-3p hsa-miR-4509 hsa-miR-5004-3p hsa-miR-654-3p hsa-miR-5096 hsa-miR-4679 hsa-miR-429 hsa-miR-508-3p hsa-miR-548d-5p hsa-miR-500b hsa-miR-26a-1-3p hsa-miR-548aa hsa-miR-154-3p hsa-miR-143-3p hsa-miR-4677-5p hsa-miR-</p> |

|  |                                                                                                                                                                                                                                                                                                                                                                                                                                                                                                                                                                                                                                                                                                                                                                                                                                                                                                                                                                                                                                                                                                                                                                                                                                                                                                                                                                                                                                                                                                                                                                                                                                                                                                                                                                                                                                                                                                                                                                                                                                                                                                                                                                                                                                                                                                                                                                                                                                                                                                                                                                                                                                                                                                                                                                                                                                                                                                                                                                                                                                                                                                                                                                                                                                                                                                                                                                                                                                                                                                                                                                                                                                                                                                                                                                                                                                                                                                                                                                                                                          |
|--|--------------------------------------------------------------------------------------------------------------------------------------------------------------------------------------------------------------------------------------------------------------------------------------------------------------------------------------------------------------------------------------------------------------------------------------------------------------------------------------------------------------------------------------------------------------------------------------------------------------------------------------------------------------------------------------------------------------------------------------------------------------------------------------------------------------------------------------------------------------------------------------------------------------------------------------------------------------------------------------------------------------------------------------------------------------------------------------------------------------------------------------------------------------------------------------------------------------------------------------------------------------------------------------------------------------------------------------------------------------------------------------------------------------------------------------------------------------------------------------------------------------------------------------------------------------------------------------------------------------------------------------------------------------------------------------------------------------------------------------------------------------------------------------------------------------------------------------------------------------------------------------------------------------------------------------------------------------------------------------------------------------------------------------------------------------------------------------------------------------------------------------------------------------------------------------------------------------------------------------------------------------------------------------------------------------------------------------------------------------------------------------------------------------------------------------------------------------------------------------------------------------------------------------------------------------------------------------------------------------------------------------------------------------------------------------------------------------------------------------------------------------------------------------------------------------------------------------------------------------------------------------------------------------------------------------------------------------------------------------------------------------------------------------------------------------------------------------------------------------------------------------------------------------------------------------------------------------------------------------------------------------------------------------------------------------------------------------------------------------------------------------------------------------------------------------------------------------------------------------------------------------------------------------------------------------------------------------------------------------------------------------------------------------------------------------------------------------------------------------------------------------------------------------------------------------------------------------------------------------------------------------------------------------------------------------------------------------------------------------------------------------------------|
|  | <p>4299 hsa-miR-5197-5p hsa-miR-519d hsa-miR-5692b hsa-miR-612 hsa-miR-935 hsa-miR-548aq-5p hsa-miR-126-5p hsa-miR-488-5p hsa-miR-3138 hsa-miR-6506-5p hsa-miR-676-3p hsa-miR-3142 hsa-miR-6721-5p hsa-miR-3927-3p hsa-miR-4259 hsa-miR-491-3p hsa-miR-376c-3p hsa-miR-4724-3p hsa-miR-4524a-3p hsa-miR-362-3p hsa-miR-1257 hsa-miR-4667-5p hsa-miR-412 hsa-miR-4798-3p hsa-miR-567 hsa-miR-4728-3p hsa-miR-548q hsa-miR-2052 hsa-miR-4478 hsa-miR-4307 hsa-miR-889 hsa-miR-937-5p hsa-miR-548ap-3p hsa-miR-571 hsa-miR-3175 hsa-miR-4446-5p hsa-miR-4517 hsa-miR-3128 hsa-miR-526a hsa-miR-4709-5p hsa-miR-501-5p hsa-miR-5702 hsa-miR-5580-5p hsa-miR-642a-3p hsa-miR-527 hsa-miR-3185 hsa-miR-4270 hsa-miR-556-5p hsa-miR-4705 hsa-miR-3653 hsa-miR-519a-5p hsa-miR-759 hsa-miR-2116-5p hsa-miR-1915-5p hsa-miR-224-5p hsa-miR-548t-5p hsa-miR-3675-3p hsa-miR-4700-5p hsa-miR-520h hsa-miR-4713-5p hsa-miR-186-5p hsa-miR-339-5p hsa-miR-486-5p hsa-miR-548ay-5p hsa-miR-4320 hsa-miR-4782-3p hsa-miR-1279 hsa-miR-135a-5p hsa-miR-656 hsa-miR-3922-5p hsa-miR-4799-3p hsa-miR-1587 hsa-miR-2053 hsa-miR-93-5p hsa-miR-4452 hsa-miR-548k hsa-miR-764 hsa-miR-518f-5p hsa-miR-4330 hsa-miR-626 hsa-miR-130b-5p hsa-miR-1251 hsa-miR-670 hsa-miR-939-5p hsa-miR-4772-3p hsa-miR-144-5p hsa-miR-379-3p hsa-miR-1304-3p hsa-miR-206 hsa-miR-4715-5p hsa-miR-1972 hsa-miR-340-5p hsa-miR-4272 hsa-miR-219-5p hsa-miR-25-3p hsa-miR-3942-3p hsa-miR-556-3p hsa-miR-548o-5p hsa-miR-367-3p hsa-miR-601 hsa-miR-1298 hsa-miR-5189 hsa-miR-4738-3p hsa-miR-3668 hsa-miR-4434 hsa-miR-509-5p hsa-miR-944 hsa-miR-3184-3p hsa-miR-1265 hsa-miR-3121-5p hsa-miR-3679-3p hsa-miR-140-3p hsa-miR-369-3p hsa-miR-216a-5p hsa-miR-1183 hsa-miR-548h-5p hsa-miR-662 hsa-miR-4736 hsa-miR-3652 hsa-miR-520d-5p hsa-miR-4428 hsa-miR-3147 hsa-miR-4653-3p hsa-miR-27a-3p hsa-miR-3179 hsa-miR-5007-5p hsa-miR-1285-5p hsa-miR-539-5p hsa-miR-3124-3p hsa-miR-33b-5p hsa-miR-4275 hsa-miR-510 hsa-miR-3064-5p hsa-miR-509-3-5p hsa-miR-365b-5p hsa-miR-873-5p hsa-miR-3180-5p hsa-miR-4477b hsa-miR-548ah-5p hsa-miR-7-2-3p hsa-miR-222-5p hsa-miR-3123 hsa-miR-4768-5p hsa-miR-16-1-3p hsa-miR-4777-3p hsa-miR-181a-2-3p hsa-miR-335-3p hsa-miR-4789-3p hsa-miR-219-1-3p hsa-miR-27a-5p hsa-miR-513a-5p hsa-miR-875-5p hsa-miR-1245a hsa-miR-650 hsa-miR-517-5p hsa-miR-4635 hsa-miR-3163 hsa-miR-18b-5p hsa-miR-18a-5p hsa-miR-9-5p hsa-miR-216a-3p hsa-miR-7-1-3p hsa-miR-892c-3p hsa-miR-6507-3p hsa-miR-374a-5p hsa-miR-3662 hsa-miR-4278 hsa-miR-604 hsa-miR-28-3p hsa-miR-3611 hsa-miR-4456 hsa-miR-196a-5p hsa-miR-514b-5p hsa-miR-3607-3p hsa-miR-3146 hsa-miR-4325 hsa-miR-3613-3p hsa-miR-548a-5p hsa-miR-526b-3p hsa-miR-647 hsa-miR-559 hsa-miR-3976 hsa-miR-642b-3p hsa-miR-363-3p hsa-miR-548x-5p hsa-miR-4685-5p hsa-miR-3978 hsa-miR-5683 hsa-miR-3934-5p hsa-miR-6508-5p hsa-miR-4443 hsa-miR-22-5p hsa-miR-3190-3p hsa-miR-548m hsa-miR-182-3p hsa-miR-3173-3p hsa-miR-4448 hsa-miR-4430 hsa-miR-365a-5p hsa-miR-129-5p hsa-miR-380-3p hsa-miR-548n hsa-miR-4733-5p hsa-miR-217 hsa-miR-3942-5p hsa-miR-1245b-5p hsa-miR-548ak hsa-miR-5588-5p hsa-miR-3191-5p hsa-miR-5688 hsa-miR-3679-5p hsa-miR-411-3p hsa-miR-548c-5p hsa-miR-514a-3p hsa-miR-4672 hsa-miR-4753-3p hsa-miR-3925-5p hsa-miR-4697-3p hsa-miR-196b-5p hsa-miR-4699-5p hsa-miR-5787 hsa-miR-5585-3p hsa-miR-4760-3p hsa-miR-619 hsa-miR-203a hsa-miR-195-3p hsa-miR-548aj-5p hsa-miR-548ap-5p hsa-miR-216b hsa-miR-6510-5p hsa-miR-3605-5p hsa-miR-506-5p hsa-miR-299-5p hsa-miR-548p hsa-miR-4470 hsa-miR-5691 hsa-miR-524-5p hsa-miR-4794 hsa-miR-449c-3p hsa-miR-10b-3p hsa-miR-548ay-3p hsa-miR-5011-5p hsa-miR-5100 hsa-miR-200b-3p hsa-miR-548ar-5p hsa-miR-337-3p hsa-miR-1305 hsa-miR-92a-3p hsa-miR-4763-3p hsa-miR-548i hsa-miR-660-5p hsa-miR-6089 hsa-miR-550b-3p hsa-miR-520a-5p hsa-miR-378g hsa-miR-4533 hsa-miR-29a-5p hsa-miR-3155b hsa-miR-3941 hsa-miR-329 hsa-miR-26b-3p hsa-miR-153 hsa-miR-523-5p hsa-miR-4796-3p hsa-miR-</p> |
|--|--------------------------------------------------------------------------------------------------------------------------------------------------------------------------------------------------------------------------------------------------------------------------------------------------------------------------------------------------------------------------------------------------------------------------------------------------------------------------------------------------------------------------------------------------------------------------------------------------------------------------------------------------------------------------------------------------------------------------------------------------------------------------------------------------------------------------------------------------------------------------------------------------------------------------------------------------------------------------------------------------------------------------------------------------------------------------------------------------------------------------------------------------------------------------------------------------------------------------------------------------------------------------------------------------------------------------------------------------------------------------------------------------------------------------------------------------------------------------------------------------------------------------------------------------------------------------------------------------------------------------------------------------------------------------------------------------------------------------------------------------------------------------------------------------------------------------------------------------------------------------------------------------------------------------------------------------------------------------------------------------------------------------------------------------------------------------------------------------------------------------------------------------------------------------------------------------------------------------------------------------------------------------------------------------------------------------------------------------------------------------------------------------------------------------------------------------------------------------------------------------------------------------------------------------------------------------------------------------------------------------------------------------------------------------------------------------------------------------------------------------------------------------------------------------------------------------------------------------------------------------------------------------------------------------------------------------------------------------------------------------------------------------------------------------------------------------------------------------------------------------------------------------------------------------------------------------------------------------------------------------------------------------------------------------------------------------------------------------------------------------------------------------------------------------------------------------------------------------------------------------------------------------------------------------------------------------------------------------------------------------------------------------------------------------------------------------------------------------------------------------------------------------------------------------------------------------------------------------------------------------------------------------------------------------------------------------------------------------------------------------------------------------|

|              |     |                                                                                                                                                                                                                                                                                                                                                                                                                                                                                                                                                                                                                                                                                                                                                                                                                                                                                                                                                                                                                                                                                                                                                                                                                                                                                                                                                                                                                                                                                                                                                                                                                                                                                                                                                                                                                                                                                                                                                                                                                                                                                                                                                                                                                                                                                                                                                                                                                                                                                                                                                                                                                                                                                                                                             |
|--------------|-----|---------------------------------------------------------------------------------------------------------------------------------------------------------------------------------------------------------------------------------------------------------------------------------------------------------------------------------------------------------------------------------------------------------------------------------------------------------------------------------------------------------------------------------------------------------------------------------------------------------------------------------------------------------------------------------------------------------------------------------------------------------------------------------------------------------------------------------------------------------------------------------------------------------------------------------------------------------------------------------------------------------------------------------------------------------------------------------------------------------------------------------------------------------------------------------------------------------------------------------------------------------------------------------------------------------------------------------------------------------------------------------------------------------------------------------------------------------------------------------------------------------------------------------------------------------------------------------------------------------------------------------------------------------------------------------------------------------------------------------------------------------------------------------------------------------------------------------------------------------------------------------------------------------------------------------------------------------------------------------------------------------------------------------------------------------------------------------------------------------------------------------------------------------------------------------------------------------------------------------------------------------------------------------------------------------------------------------------------------------------------------------------------------------------------------------------------------------------------------------------------------------------------------------------------------------------------------------------------------------------------------------------------------------------------------------------------------------------------------------------------|
|              |     | <p>4262 hsa-miR-4691-5p hsa-miR-4482-3p hsa-miR-5571-5p hsa-miR-6502-5p hsa-miR-4762-3p hsa-miR-129-2-3p hsa-miR-1207-3p hsa-miR-2115-3p hsa-miR-362-5p hsa-miR-1286 hsa-miR-6083 hsa-miR-3675-5p hsa-miR-484 hsa-miR-548as-5p hsa-miR-382-3p hsa-miR-204-3p hsa-miR-4422 hsa-miR-5093 hsa-miR-4441 hsa-miR-4309 hsa-miR-3620-5p hsa-miR-4796-5p hsa-miR-502-5p hsa-miR-5187-3p hsa-miR-1208 hsa-miR-19a-5p hsa-miR-1253 hsa-miR-1233-3p hsa-miR-1185-5p hsa-miR-1273d hsa-miR-149-5p hsa-miR-3198 hsa-miR-4646-5p hsa-miR-5190 hsa-miR-4712-3p hsa-miR-498 hsa-miR-5681b hsa-miR-4795-3p hsa-miR-374b-5p hsa-miR-548w hsa-miR-4445-5p hsa-miR-4772-5p hsa-miR-4786-3p hsa-miR-3158-3p hsa-miR-4427 hsa-miR-23b-5p hsa-miR-568 hsa-miR-596 hsa-miR-3616-5p hsa-miR-5088 hsa-miR-940 hsa-miR-516b-5p hsa-miR-5703 hsa-miR-184 hsa-miR-449c-5p hsa-miR-135b-5p hsa-miR-125a-3p hsa-miR-548av-3p hsa-miR-3187-5p hsa-miR-3121-3p hsa-miR-450b-5p hsa-miR-452-5p hsa-miR-548j hsa-miR-607 hsa-miR-520c-5p hsa-miR-578 hsa-miR-4766-5p hsa-miR-383 hsa-miR-934 hsa-miR-4742-3p hsa-miR-4495 hsa-miR-3609 hsa-miR-548aw hsa-miR-548a-3p hsa-miR-6126 hsa-miR-3973 hsa-miR-548au-5p hsa-miR-452-3p hsa-miR-4719 hsa-miR-19b-2-5p hsa-miR-221-5p hsa-miR-548at-3p hsa-miR-451b hsa-miR-4670-3p hsa-miR-4720-5p hsa-miR-361-3p hsa-miR-4446-3p hsa-miR-628-5p hsa-miR-4708-5p hsa-miR-3192 hsa-miR-100-3p hsa-miR-3133 hsa-miR-203b-3p hsa-miR-4703-5p hsa-miR-5008-5p hsa-miR-4700-3p hsa-miR-27b-5p hsa-miR-659-3p hsa-miR-3929 hsa-miR-4755-3p hsa-miR-32-3p hsa-miR-4273 hsa-miR-2467-3p hsa-miR-4769-3p hsa-miR-548ab hsa-miR-548y hsa-miR-664a-5p hsa-miR-4279 hsa-miR-335-5p hsa-miR-466 hsa-miR-4425 hsa-miR-16-2-3p hsa-miR-4766-3p hsa-miR-1245b-3p hsa-miR-3165 hsa-miR-1827 hsa-miR-1299 hsa-miR-548c-3p hsa-miR-4639-5p hsa-miR-1264 hsa-miR-297 hsa-miR-5583-3p hsa-miR-548l hsa-miR-1283 hsa-miR-548e hsa-miR-629-3p hsa-miR-655 hsa-miR-377-3p hsa-miR-374c-5p hsa-miR-6165 hsa-miR-3150a-3p hsa-miR-577 hsa-miR-4770 hsa-miR-218-1-3p hsa-miR-3129-3p hsa-miR-5003-5p hsa-miR-4804-5p hsa-miR-376a-5p hsa-miR-300 hsa-miR-6507-5p hsa-miR-495-3p hsa-miR-4775 hsa-miR-4507 hsa-miR-4293 hsa-miR-4516 hsa-miR-4475 hsa-miR-409-3p hsa-miR-627 hsa-miR-4666a-3p hsa-miR-513c-3p hsa-miR-3920 hsa-miR-548az-3p hsa-miR-212-5p hsa-miR-519b-5p hsa-miR-544a hsa-miR-15a-3p hsa-miR-3614-3p hsa-miR-33a-3p hsa-miR-548g-3p hsa-miR-5580-3p hsa-miR-4461 hsa-miR-519c-5p hsa-miR-5008-3p hsa-miR-27b-3p hsa-miR-346 hsa-miR-205-3p hsa-miR-5582-3p hsa-miR-548g-5p hsa-miR-513c-5p hsa-miR-4800-5p hsa-miR-6086 hsa-miR-4801 hsa-miR-548as-3p hsa-miR-613 hsa-miR-514b-3p hsa-miR-1225-3p hsa-miR-512-5p hsa-miR-4643 hsa-miR-4687-5p</p> |
| SRC-1; SRC-3 | 13  | <p>hsa-miR-4633-3p hsa-miR-938 hsa-miR-301b hsa-miR-301a-3p hsa-miR-4295 hsa-miR-130a-3p hsa-miR-138-5p hsa-miR-3667-3p hsa-miR-6131 hsa-miR-3666 hsa-miR-130b-3p hsa-miR-454-3p hsa-miR-6500-5p</p>                                                                                                                                                                                                                                                                                                                                                                                                                                                                                                                                                                                                                                                                                                                                                                                                                                                                                                                                                                                                                                                                                                                                                                                                                                                                                                                                                                                                                                                                                                                                                                                                                                                                                                                                                                                                                                                                                                                                                                                                                                                                                                                                                                                                                                                                                                                                                                                                                                                                                                                                        |
| SRC-2; SRC-3 | 23  | <p>hsa-miR-4534 hsa-miR-4302 hsa-miR-302a-5p hsa-miR-370 hsa-miR-1246 hsa-miR-582-5p hsa-miR-4804-3p hsa-miR-4720-3p hsa-miR-3658 hsa-miR-3663-5p hsa-miR-5195-3p hsa-miR-376a-2-5p hsa-miR-3134 hsa-miR-432-3p hsa-miR-3145-3p hsa-miR-1178-3p hsa-miR-34c-3p hsa-miR-767-3p hsa-miR-616-3p hsa-miR-4716-3p hsa-miR-145-5p hsa-miR-4780 hsa-miR-3935</p>                                                                                                                                                                                                                                                                                                                                                                                                                                                                                                                                                                                                                                                                                                                                                                                                                                                                                                                                                                                                                                                                                                                                                                                                                                                                                                                                                                                                                                                                                                                                                                                                                                                                                                                                                                                                                                                                                                                                                                                                                                                                                                                                                                                                                                                                                                                                                                                   |
| SRC-1        | 242 | <p>hsa-miR-665 hsa-miR-5089-3p hsa-miR-5089-5p hsa-miR-202-3p hsa-miR-615-5p hsa-miR-193a-5p hsa-miR-4474-3p hsa-miR-3688-5p hsa-miR-34a-3p hsa-miR-3122 hsa-miR-4274 hsa-miR-101-5p hsa-miR-1248 hsa-miR-6132 hsa-miR-5186 hsa-miR-1238-5p hsa-miR-3074-5p hsa-miR-449a hsa-miR-5001-5p hsa-miR-4765 hsa-miR-4710 hsa-miR-943 hsa-miR-191-3p hsa-miR-5590-5p hsa-miR-19a-3p hsa-miR-1915-3p hsa-miR-3938 hsa-miR-4491 hsa-miR-584-5p hsa-let-7b-5p hsa-miR-19b-3p hsa-miR-302b-5p hsa-miR-1287 hsa-miR-1252 hsa-miR-3135b hsa-miR-4436b-3p hsa-miR-4664-5p hsa-miR-1296 hsa-miR-766-5p hsa-miR-96-</p>                                                                                                                                                                                                                                                                                                                                                                                                                                                                                                                                                                                                                                                                                                                                                                                                                                                                                                                                                                                                                                                                                                                                                                                                                                                                                                                                                                                                                                                                                                                                                                                                                                                                                                                                                                                                                                                                                                                                                                                                                                                                                                                                     |

|       |     |                                                                                                                                                                                                                                                                                                                                                                                                                                                                                                                                                                                                                                                                                                                                                                                                                                                                                                                                                                                                                                                                                                                                                                                                                                                                                                                                                                                                                                                                                                                                                                                                                                                                                                                                                                                                                                                                                                                                                                                                                                                                                                                                                                                                                                                                                                                                                                                                                                                                                                                                                                                                                                                                                                                                                                                                                                                                                                                                                                                                                                            |
|-------|-----|--------------------------------------------------------------------------------------------------------------------------------------------------------------------------------------------------------------------------------------------------------------------------------------------------------------------------------------------------------------------------------------------------------------------------------------------------------------------------------------------------------------------------------------------------------------------------------------------------------------------------------------------------------------------------------------------------------------------------------------------------------------------------------------------------------------------------------------------------------------------------------------------------------------------------------------------------------------------------------------------------------------------------------------------------------------------------------------------------------------------------------------------------------------------------------------------------------------------------------------------------------------------------------------------------------------------------------------------------------------------------------------------------------------------------------------------------------------------------------------------------------------------------------------------------------------------------------------------------------------------------------------------------------------------------------------------------------------------------------------------------------------------------------------------------------------------------------------------------------------------------------------------------------------------------------------------------------------------------------------------------------------------------------------------------------------------------------------------------------------------------------------------------------------------------------------------------------------------------------------------------------------------------------------------------------------------------------------------------------------------------------------------------------------------------------------------------------------------------------------------------------------------------------------------------------------------------------------------------------------------------------------------------------------------------------------------------------------------------------------------------------------------------------------------------------------------------------------------------------------------------------------------------------------------------------------------------------------------------------------------------------------------------------------------|
|       |     | <p>5p hsa-miR-5579-5p hsa-miR-4721 hsa-miR-17-3p hsa-miR-4286 hsa-miR-3200-3p hsa-miR-641 hsa-miR-1193 hsa-miR-4312 hsa-miR-92a-1-5p hsa-miR-376a-3p hsa-miR-5000-5p hsa-miR-4297 hsa-miR-3676-5p hsa-miR-4758-5p hsa-miR-1255b-5p hsa-let-7g-5p hsa-miR-3655 hsa-miR-765 hsa-miR-4304 hsa-miR-296-5p hsa-miR-2355-3p hsa-miR-148b-3p hsa-miR-4682 hsa-miR-3692-5p hsa-miR-4519 hsa-miR-3661 hsa-miR-4632-5p hsa-miR-1291 hsa-miR-141-5p hsa-miR-323b-5p hsa-miR-608 hsa-miR-4277 hsa-let-7i-5p hsa-miR-584-3p hsa-miR-769-3p hsa-miR-4323 hsa-miR-4665-5p hsa-miR-3129-5p hsa-miR-3960 hsa-miR-4303 hsa-miR-762 hsa-miR-150-3p hsa-miR-4420 hsa-miR-376b-3p hsa-miR-4659a-5p hsa-miR-4778-3p hsa-miR-152 hsa-miR-4261 hsa-miR-5687 hsa-miR-4758-3p hsa-miR-1263 hsa-miR-4659b-5p hsa-miR-1914-5p hsa-miR-3197 hsa-miR-181b-3p hsa-miR-5047 hsa-miR-492 hsa-miR-3158-5p hsa-miR-4742-5p hsa-miR-1237-3p hsa-miR-4476 hsa-miR-4498 hsa-miR-342-5p hsa-miR-4741 hsa-let-7f-5p hsa-let-7d-5p hsa-miR-3616-3p hsa-miR-4514 hsa-miR-1271-5p hsa-let-7c hsa-miR-3936 hsa-miR-3117-5p hsa-miR-4656 hsa-miR-1236-5p hsa-miR-6509-3p hsa-miR-548au-3p hsa-miR-4424 hsa-miR-3688-3p hsa-miR-5191 hsa-miR-876-3p hsa-miR-3922-3p hsa-miR-3673 hsa-miR-4436b-5p hsa-miR-5694 hsa-miR-3659 hsa-miR-3166 hsa-miR-132-3p hsa-miR-3190-5p hsa-miR-4694-3p hsa-miR-1275 hsa-miR-22-3p hsa-miR-1205 hsa-miR-5187-5p hsa-miR-4646-3p hsa-miR-138-2-3p hsa-miR-490-5p hsa-miR-34c-5p hsa-miR-522-3p hsa-miR-4755-5p hsa-miR-3127-5p hsa-miR-6503-3p hsa-miR-542-3p hsa-miR-4284 hsa-miR-5581-5p hsa-miR-4269 hsa-miR-1184 hsa-miR-4797-5p hsa-miR-1301 hsa-miR-3943 hsa-miR-3617-5p hsa-miR-3907 hsa-miR-493-3p hsa-miR-890 hsa-miR-4669 hsa-miR-4726-3p hsa-miR-127-5p hsa-miR-3154 hsa-miR-4675 hsa-miR-24-3p hsa-miR-1238-3p hsa-miR-6505-5p hsa-miR-3136-3p hsa-miR-658 hsa-miR-182-5p hsa-miR-659-5p hsa-miR-4439 hsa-miR-4458 hsa-miR-1909-3p hsa-miR-3909 hsa-miR-4504 hsa-miR-4761-3p hsa-miR-4747-3p hsa-miR-6074 hsa-miR-4637 hsa-miR-5581-3p hsa-miR-6513-5p hsa-miR-6715b-5p hsa-miR-4483 hsa-miR-3657 hsa-miR-148a-3p hsa-miR-4492 hsa-miR-3126-3p hsa-miR-5001-3p hsa-miR-98-5p hsa-miR-4752 hsa-miR-302d-5p hsa-miR-432-5p hsa-miR-1324 hsa-miR-526b-5p hsa-miR-3176 hsa-miR-215 hsa-miR-4753-5p hsa-miR-4764-5p hsa-miR-936 hsa-miR-6501-3p hsa-miR-449b-5p hsa-miR-4636 hsa-miR-212-3p hsa-miR-3913-5p hsa-miR-3189-5p hsa-miR-4468 hsa-miR-93-3p hsa-miR-450b-3p hsa-miR-224-3p hsa-miR-3182 hsa-miR-4792 hsa-miR-4683 hsa-miR-4790-3p hsa-miR-299-3p hsa-miR-363-5p hsa-miR-25-5p hsa-miR-4651 hsa-miR-6722-3p hsa-miR-1255a hsa-miR-4727-5p hsa-miR-5684 hsa-let-7e-5p hsa-miR-4298 hsa-miR-323a-5p hsa-miR-640 hsa-miR-631 hsa-miR-199a-3p hsa-miR-4500 hsa-miR-34a-5p hsa-miR-5695 hsa-miR-192-5p hsa-let-7a-5p hsa-miR-3136-5p hsa-miR-5006-3p hsa-miR-4771 hsa-miR-199b-3p hsa-miR-4639-3p hsa-miR-4658 hsa-miR-574-5p hsa-miR-4692 hsa-miR-4657 hsa-miR-296-3p hsa-miR-877-3p hsa-miR-6087 hsa-miR-1302 hsa-miR-1293 hsa-miR-4502</p> |
| SRC-2 | 467 | <p>hsa-miR-5197-3p hsa-miR-4493 hsa-miR-3200-5p hsa-miR-2909 hsa-miR-3681-5p hsa-miR-548s hsa-miR-3187-3p hsa-miR-758-5p hsa-miR-4314 hsa-miR-2114-3p hsa-miR-3120-3p hsa-miR-1306-5p hsa-miR-4641 hsa-miR-23a-3p hsa-miR-4520b-3p hsa-miR-4732-5p hsa-miR-4421 hsa-miR-563 hsa-miR-1179 hsa-let-7a-3p hsa-miR-3672 hsa-miR-380-5p hsa-miR-3691-5p hsa-miR-532-3p hsa-miR-4747-5p hsa-miR-4465 hsa-miR-4797-3p hsa-miR-4690-3p hsa-miR-4684-5p hsa-miR-4650-3p hsa-miR-4671-5p hsa-miR-4463 hsa-miR-516a-3p hsa-miR-135a-3p hsa-miR-4763-5p hsa-miR-575 hsa-miR-3162-3p hsa-miR-375 hsa-miR-5196-5p hsa-miR-4748 hsa-miR-142-5p hsa-miR-664b-5p hsa-miR-486-3p hsa-miR-302c-5p hsa-miR-766-3p hsa-miR-4761-5p hsa-miR-3689d hsa-miR-4264 hsa-miR-5699 hsa-miR-200a-5p hsa-let-7b-3p hsa-miR-3910 hsa-miR-885-5p hsa-miR-4715-3p hsa-miR-4731-5p hsa-miR-769-5p hsa-miR-20a-3p hsa-miR-4694-5p hsa-miR-3677-5p hsa-miR-134 hsa-miR-342-3p hsa-</p>                                                                                                                                                                                                                                                                                                                                                                                                                                                                                                                                                                                                                                                                                                                                                                                                                                                                                                                                                                                                                                                                                                                                                                                                                                                                                                                                                                                                                                                                                                                                                                                                                                                                                                                                                                                                                                                                                                                                                                                                                                                                                          |

|  |                                                                                                                                                                                                                                                                                                                                                                                                                                                                                                                                                                                                                                                                                                                                                                                                                                                                                                                                                                                                                                                                                                                                                                                                                                                                                                                                                                                                                                                                                                                                                                                                                                                                                                                                                                                                                                                                                                                                                                                                                                                                                                                                                                                                                                                                                                                                                                                                                                                                                                                                                                                                                                                                                                                                                                                                                                                                                                                                                                                                                                                                                                                                                                                                                                                                                                                                                                                                                                                                                                                                                                                                                                                                                                                                                                                                                                                                                                                                                                                                   |
|--|---------------------------------------------------------------------------------------------------------------------------------------------------------------------------------------------------------------------------------------------------------------------------------------------------------------------------------------------------------------------------------------------------------------------------------------------------------------------------------------------------------------------------------------------------------------------------------------------------------------------------------------------------------------------------------------------------------------------------------------------------------------------------------------------------------------------------------------------------------------------------------------------------------------------------------------------------------------------------------------------------------------------------------------------------------------------------------------------------------------------------------------------------------------------------------------------------------------------------------------------------------------------------------------------------------------------------------------------------------------------------------------------------------------------------------------------------------------------------------------------------------------------------------------------------------------------------------------------------------------------------------------------------------------------------------------------------------------------------------------------------------------------------------------------------------------------------------------------------------------------------------------------------------------------------------------------------------------------------------------------------------------------------------------------------------------------------------------------------------------------------------------------------------------------------------------------------------------------------------------------------------------------------------------------------------------------------------------------------------------------------------------------------------------------------------------------------------------------------------------------------------------------------------------------------------------------------------------------------------------------------------------------------------------------------------------------------------------------------------------------------------------------------------------------------------------------------------------------------------------------------------------------------------------------------------------------------------------------------------------------------------------------------------------------------------------------------------------------------------------------------------------------------------------------------------------------------------------------------------------------------------------------------------------------------------------------------------------------------------------------------------------------------------------------------------------------------------------------------------------------------------------------------------------------------------------------------------------------------------------------------------------------------------------------------------------------------------------------------------------------------------------------------------------------------------------------------------------------------------------------------------------------------------------------------------------------------------------------------------------------------|
|  | <p>miR-6716-3p hsa-miR-5587-5p hsa-miR-542-5p hsa-miR-1231 hsa-miR-4255 hsa-miR-199a-5p hsa-miR-4455 hsa-miR-657 hsa-miR-4689 hsa-miR-136-3p hsa-miR-651 hsa-miR-580 hsa-miR-4739 hsa-miR-576-5p hsa-miR-600 hsa-miR-876-5p hsa-miR-3145-5p hsa-miR-543 hsa-miR-4291 hsa-miR-3689a-5p hsa-miR-1228-3p hsa-miR-4685-3p hsa-miR-3925-3p hsa-miR-5585-5p hsa-miR-30a-3p hsa-miR-5006-5p hsa-miR-4711-3p hsa-miR-3591-3p hsa-miR-4432 hsa-miR-3161 hsa-miR-503-3p hsa-miR-3065-5p hsa-miR-5690 hsa-miR-223-5p hsa-miR-4712-5p hsa-miR-4680-5p hsa-miR-1914-3p hsa-miR-379-5p hsa-miR-4678 hsa-miR-26b-5p hsa-miR-5708 hsa-miR-660-3p hsa-miR-4645-5p hsa-miR-1202 hsa-miR-4511 hsa-miR-197-5p hsa-miR-34b-3p hsa-miR-6715b-3p hsa-miR-21-3p hsa-miR-550b-2-5p hsa-miR-599 hsa-miR-5589-5p hsa-miR-4263 hsa-miR-4791 hsa-miR-4673 hsa-miR-885-3p hsa-miR-495-5p hsa-miR-643 hsa-miR-4735-5p hsa-miR-23c hsa-miR-4539 hsa-miR-4310 hsa-miR-770-5p hsa-miR-4722-3p hsa-miR-1323 hsa-miR-4521 hsa-miR-4292 hsa-miR-384 hsa-miR-154-5p hsa-miR-449b-3p hsa-miR-4253 hsa-miR-1226-3p hsa-miR-2681-5p hsa-miR-23b-3p hsa-miR-3613-5p hsa-miR-4762-5p hsa-miR-200b-5p hsa-miR-98-3p hsa-miR-3713 hsa-miR-5195-5p hsa-miR-3157-5p hsa-miR-4774-3p hsa-miR-122-3p hsa-miR-1270 hsa-miR-3168 hsa-miR-516b-3p hsa-miR-10b-5p hsa-miR-148b-5p hsa-miR-3972 hsa-miR-331-5p hsa-miR-3132 hsa-miR-4760-5p hsa-miR-31-5p hsa-miR-3924 hsa-miR-181d hsa-miR-4503 hsa-miR-4999-3p hsa-miR-497-3p hsa-miR-6508-3p hsa-miR-5193 hsa-miR-139-3p hsa-miR-942 hsa-miR-873-3p hsa-miR-9-3p hsa-miR-2681-3p hsa-miR-6073 hsa-miR-4711-5p hsa-miR-6085 hsa-miR-4459 hsa-miR-3650 hsa-miR-4789-5p hsa-miR-4686 hsa-miR-133b hsa-miR-4524b-5p hsa-miR-139-5p hsa-miR-6081 hsa-miR-4795-5p hsa-miR-301a-5p hsa-miR-4756-5p hsa-miR-451a hsa-miR-548ag hsa-miR-155-3p hsa-miR-3125 hsa-miR-103a-3p hsa-miR-199b-5p hsa-miR-4696 hsa-miR-1229-3p hsa-miR-1284 hsa-miR-1229-5p hsa-miR-4499 hsa-miR-4781-5p hsa-miR-1321 hsa-miR-4305 hsa-miR-5094 hsa-miR-6072 hsa-miR-4745-5p hsa-miR-6079 hsa-miR-548ax hsa-miR-6511b-5p hsa-miR-144-3p hsa-miR-3945 hsa-miR-3607-5p hsa-miR-374a-3p hsa-miR-141-3p hsa-miR-3915 hsa-miR-5007-3p hsa-miR-218-5p hsa-miR-663b hsa-miR-4450 hsa-miR-376c-5p hsa-miR-3064-3p hsa-miR-4803 hsa-miR-4251 hsa-miR-4783-3p hsa-miR-892a hsa-miR-136-5p hsa-miR-3689e hsa-miR-5584-3p hsa-miR-3689f hsa-miR-3120-5p hsa-miR-3691-3p hsa-miR-3183 hsa-miR-632 hsa-miR-4684-3p hsa-miR-1537 hsa-miR-4289 hsa-miR-423-5p hsa-miR-181c-5p hsa-miR-5685 hsa-miR-1272 hsa-miR-499b-5p hsa-miR-200a-3p hsa-miR-4703-3p hsa-miR-29b-1-5p hsa-miR-219-2-3p hsa-miR-4526 hsa-miR-3164 hsa-miR-4317 hsa-miR-155-5p hsa-miR-595 hsa-miR-142-3p hsa-miR-4474-5p hsa-miR-411-5p hsa-miR-570-5p hsa-miR-891b hsa-miR-3606-5p hsa-miR-3529-5p hsa-miR-5700 hsa-miR-3152-5p hsa-miR-3916 hsa-miR-502-3p hsa-miR-4754 hsa-miR-5586-3p hsa-miR-4306 hsa-miR-3689b-5p hsa-miR-3918 hsa-miR-4802-3p hsa-miR-185-5p hsa-miR-888-5p hsa-miR-6077 hsa-miR-548o-3p hsa-miR-624-3p hsa-miR-181c-3p hsa-miR-4256 hsa-miR-133a hsa-miR-3118 hsa-miR-6076 hsa-miR-4531 hsa-miR-1290 hsa-miR-4778-5p hsa-miR-378j hsa-miR-6513-3p hsa-miR-4524a-5p hsa-miR-4640-5p hsa-miR-3140-3p hsa-miR-10a-5p hsa-miR-5009-3p hsa-miR-4723-3p hsa-miR-3928 hsa-miR-4726-5p hsa-miR-490-3p hsa-miR-101-3p hsa-miR-4644 hsa-miR-6716-5p hsa-miR-193b-3p hsa-miR-3620-3p hsa-miR-589-3p hsa-miR-5194 hsa-miR-5590-3p hsa-miR-4528 hsa-miR-2116-3p hsa-miR-4512 hsa-miR-625-3p hsa-miR-323a-3p hsa-miR-3065-3p hsa-miR-892b hsa-miR-3143 hsa-miR-4494 hsa-miR-4714-3p hsa-miR-15b-3p hsa-miR-1825 hsa-miR-181b-5p hsa-miR-4645-3p hsa-miR-6509-5p hsa-miR-508-5p hsa-miR-1911-3p hsa-miR-587 hsa-miR-1303 hsa-miR-5589-3p hsa-miR-4417 hsa-miR-4469 hsa-miR-624-5p hsa-miR-1304-5p hsa-miR-193b-5p hsa-miR-376b-5p hsa-miR-3137 hsa-miR-1185-2-3p hsa-miR-3685 hsa-miR-5579-3p hsa-miR-4451 hsa-miR-1273e hsa-miR-3201 hsa-miR-302f hsa-miR-3660 hsa-</p> |
|--|---------------------------------------------------------------------------------------------------------------------------------------------------------------------------------------------------------------------------------------------------------------------------------------------------------------------------------------------------------------------------------------------------------------------------------------------------------------------------------------------------------------------------------------------------------------------------------------------------------------------------------------------------------------------------------------------------------------------------------------------------------------------------------------------------------------------------------------------------------------------------------------------------------------------------------------------------------------------------------------------------------------------------------------------------------------------------------------------------------------------------------------------------------------------------------------------------------------------------------------------------------------------------------------------------------------------------------------------------------------------------------------------------------------------------------------------------------------------------------------------------------------------------------------------------------------------------------------------------------------------------------------------------------------------------------------------------------------------------------------------------------------------------------------------------------------------------------------------------------------------------------------------------------------------------------------------------------------------------------------------------------------------------------------------------------------------------------------------------------------------------------------------------------------------------------------------------------------------------------------------------------------------------------------------------------------------------------------------------------------------------------------------------------------------------------------------------------------------------------------------------------------------------------------------------------------------------------------------------------------------------------------------------------------------------------------------------------------------------------------------------------------------------------------------------------------------------------------------------------------------------------------------------------------------------------------------------------------------------------------------------------------------------------------------------------------------------------------------------------------------------------------------------------------------------------------------------------------------------------------------------------------------------------------------------------------------------------------------------------------------------------------------------------------------------------------------------------------------------------------------------------------------------------------------------------------------------------------------------------------------------------------------------------------------------------------------------------------------------------------------------------------------------------------------------------------------------------------------------------------------------------------------------------------------------------------------------------------------------------------------------|



|       |    |                                                                                                                                                                                                                                                                                                                                                                                                                                                                                                                                                                                                                                                                                                                                                                                                                                                                                                                                                                                                                                                                                                                                                                                                                                                                                                                                                                                                                                                                                                                                                                                                                                                                                                                                                                                                                                                                                                                                                                                                                                                                                                                          |
|-------|----|--------------------------------------------------------------------------------------------------------------------------------------------------------------------------------------------------------------------------------------------------------------------------------------------------------------------------------------------------------------------------------------------------------------------------------------------------------------------------------------------------------------------------------------------------------------------------------------------------------------------------------------------------------------------------------------------------------------------------------------------------------------------------------------------------------------------------------------------------------------------------------------------------------------------------------------------------------------------------------------------------------------------------------------------------------------------------------------------------------------------------------------------------------------------------------------------------------------------------------------------------------------------------------------------------------------------------------------------------------------------------------------------------------------------------------------------------------------------------------------------------------------------------------------------------------------------------------------------------------------------------------------------------------------------------------------------------------------------------------------------------------------------------------------------------------------------------------------------------------------------------------------------------------------------------------------------------------------------------------------------------------------------------------------------------------------------------------------------------------------------------|
|       |    | miR-421 hsa-miR-521 hsa-miR-151a-3p hsa-miR-200c-5p hsa-miR-590-5p hsa-miR-5192 hsa-miR-582-3p hsa-miR-106b-3p hsa-miR-570-3p hsa-miR-2113 hsa-miR-622 hsa-miR-3177-5p hsa-miR-506-3p hsa-miR-4670-5p hsa-miR-31-3p hsa-miR-676-5p hsa-miR-5681a hsa-miR-3974 hsa-miR-505-3p hsa-miR-4701-5p hsa-miR-147a hsa-miR-6724-5p hsa-miR-124-3p hsa-miR-96-3p hsa-miR-4529-5p hsa-miR-3184-5p hsa-miR-4633-5p hsa-miR-4676-5p hsa-miR-4290 hsa-miR-3926 hsa-miR-4688 hsa-miR-4464 hsa-miR-1297 hsa-miR-664a-3p hsa-miR-4522 hsa-miR-921 hsa-miR-193a-3p hsa-miR-4529-3p hsa-miR-4776-3p hsa-miR-1243 hsa-miR-30e-3p hsa-miR-20b-3p hsa-miR-4481 hsa-miR-5188 hsa-miR-6719-3p hsa-miR-4737 hsa-miR-4318 hsa-miR-1262 hsa-miR-2115-5p hsa-miR-4662a-5p hsa-miR-4471 hsa-miR-561-5p hsa-miR-1224-5p hsa-miR-802 hsa-miR-592 hsa-miR-3714 hsa-miR-545-5p hsa-miR-4773 hsa-miR-4653-5p hsa-miR-588 hsa-miR-545-3p hsa-miR-1261 hsa-miR-146a-3p hsa-miR-5087 hsa-miR-5701 hsa-miR-4704-5p hsa-miR-3654 hsa-miR-3152-3p hsa-miR-3174 hsa-miR-1206 hsa-miR-548b-3p hsa-miR-194-5p hsa-miR-1322 hsa-miR-148a-5p hsa-miR-609 hsa-miR-4716-5p hsa-miR-4440 hsa-miR-620 hsa-miR-4329 hsa-let-7f-2-3p hsa-miR-3167 hsa-miR-4660 hsa-miR-2964a-3p hsa-miR-1292-5p hsa-miR-550a-3p hsa-miR-3144-3p hsa-miR-150-5p hsa-let-7f-1-3p hsa-miR-4724-5p hsa-miR-4287 hsa-miR-1227-3p hsa-miR-1256 hsa-miR-3921 hsa-miR-30d-3p hsa-miR-4435 hsa-miR-4266 hsa-miR-3914 hsa-miR-26a-5p hsa-miR-1225-5p hsa-miR-4288 hsa-miR-181a-5p hsa-miR-4662a-3p hsa-miR-3674 hsa-miR-4308 hsa-miR-4701-3p hsa-miR-374c-3p hsa-miR-4729 hsa-miR-7-5p hsa-miR-4433-3p hsa-miR-5689 hsa-miR-130a-5p hsa-miR-1278 hsa-miR-382-5p hsa-miR-888-3p hsa-miR-3115 hsa-miR-107 hsa-miR-5010-3p hsa-miR-4733-3p hsa-miR-3940-3p hsa-miR-6071 hsa-miR-218-2-3p hsa-miR-183-5p hsa-miR-135b-3p hsa-miR-548ai hsa-miR-501-3p hsa-miR-548ao-5p hsa-miR-1226-5p hsa-miR-103b hsa-miR-3665 hsa-miR-5095 hsa-miR-4767 hsa-miR-4423-3p hsa-miR-21-5p hsa-miR-649 hsa-miR-4786-5p hsa-miR-1185-1-3p hsa-miR-433 hsa-miR-3529-3p hsa-miR-4252 hsa-miR-4768-3p hsa-miR-3159 hsa-miR-1976 |
| SRC-3 | 29 | hsa-miR-140-5p hsa-miR-500a-5p hsa-miR-320c hsa-miR-6718-5p hsa-miR-3670 hsa-miR-874 hsa-miR-323b-3p hsa-miR-194-3p hsa-miR-532-5p hsa-miR-3157-3p hsa-miR-1910 hsa-miR-4662b hsa-miR-4429 hsa-miR-597 hsa-miR-455-3p hsa-miR-203b-5p hsa-miR-4426 hsa-miR-1273g-5p hsa-miR-5571-3p hsa-miR-320d hsa-miR-1277-3p hsa-miR-320a hsa-miR-4647 hsa-miR-320b hsa-miR-6080 hsa-miR-4473 hsa-miR-1234-5p hsa-miR-4671-3p hsa-miR-5693                                                                                                                                                                                                                                                                                                                                                                                                                                                                                                                                                                                                                                                                                                                                                                                                                                                                                                                                                                                                                                                                                                                                                                                                                                                                                                                                                                                                                                                                                                                                                                                                                                                                                           |

**Table S4.** Overview of Intersections: Platforms TargetScan, miRDB, and miRmap.

| Name                      | Total | microRNAs                                                                                                                                                                                                                                                                                                                                                                                                                                                                                                                                                                                                                                                                                                                                                                                                                                                                                                                                                                                                                                                                                                                                                                                                                                                                                                                                                                                                                                                                                                                                                                                                                                                                                                                                                                                                                                                                                                                                                                       |
|---------------------------|-------|---------------------------------------------------------------------------------------------------------------------------------------------------------------------------------------------------------------------------------------------------------------------------------------------------------------------------------------------------------------------------------------------------------------------------------------------------------------------------------------------------------------------------------------------------------------------------------------------------------------------------------------------------------------------------------------------------------------------------------------------------------------------------------------------------------------------------------------------------------------------------------------------------------------------------------------------------------------------------------------------------------------------------------------------------------------------------------------------------------------------------------------------------------------------------------------------------------------------------------------------------------------------------------------------------------------------------------------------------------------------------------------------------------------------------------------------------------------------------------------------------------------------------------------------------------------------------------------------------------------------------------------------------------------------------------------------------------------------------------------------------------------------------------------------------------------------------------------------------------------------------------------------------------------------------------------------------------------------------------|
| TargetScan; miRDB; miRmap | 2     | hsa-miR-137 hsa-miR-3646                                                                                                                                                                                                                                                                                                                                                                                                                                                                                                                                                                                                                                                                                                                                                                                                                                                                                                                                                                                                                                                                                                                                                                                                                                                                                                                                                                                                                                                                                                                                                                                                                                                                                                                                                                                                                                                                                                                                                        |
| TargetScan; miRDB;        | 9     | hsa-miR-548t-5p hsa-miR-548c-3p hsa-miR-4699-3p hsa-miR-3163 hsa-miR-1283 hsa-miR-8485 hsa-miR-548az-5p hsa-miR-1277-5p hsa-miR-3191-5p                                                                                                                                                                                                                                                                                                                                                                                                                                                                                                                                                                                                                                                                                                                                                                                                                                                                                                                                                                                                                                                                                                                                                                                                                                                                                                                                                                                                                                                                                                                                                                                                                                                                                                                                                                                                                                         |
| TargetScan; miRmap        | 24    | hsa-miR-145-3p hsa-miR-3690 hsa-miR-548aj-3p hsa-miR-875-3p hsa-miR-4659b-3p hsa-miR-3913-3p hsa-let-7a-2-3p hsa-miR-4659a-3p hsa-miR-4271 hsa-miR-29b-2-5p hsa-miR-4254 hsa-miR-4725-3p hsa-miR-3148 hsa-miR-548am-3p hsa-miR-548aq-3p hsa-miR-4668-5p hsa-miR-493-5p hsa-miR-548ah-3p hsa-miR-548x-3p hsa-miR-6128 hsa-miR-6124 hsa-miR-143-5p hsa-let-7g-3p hsa-miR-3671                                                                                                                                                                                                                                                                                                                                                                                                                                                                                                                                                                                                                                                                                                                                                                                                                                                                                                                                                                                                                                                                                                                                                                                                                                                                                                                                                                                                                                                                                                                                                                                                     |
| miRDB; miRmap             | 0     |                                                                                                                                                                                                                                                                                                                                                                                                                                                                                                                                                                                                                                                                                                                                                                                                                                                                                                                                                                                                                                                                                                                                                                                                                                                                                                                                                                                                                                                                                                                                                                                                                                                                                                                                                                                                                                                                                                                                                                                 |
| TargetScan                | 173   | hsa-miR-557 hsa-miR-4743-3p hsa-miR-329-3p hsa-miR-5787 hsa-miR-548ae-3p hsa-miR-4728-5p hsa-miR-23c hsa-miR-6750-3p hsa-miR-195-3p hsa-miR-365b-5p hsa-miR-335-5p hsa-miR-513b-5p hsa-miR-16-2-3p hsa-miR-548aj-5p hsa-miR-548ah-5p hsa-miR-7-2-3p hsa-miR-4766-3p hsa-miR-1245b-3p hsa-miR-4795-3p hsa-miR-6891-5p hsa-miR-506-5p hsa-miR-708-3p hsa-miR-374b-5p hsa-miR-3123 hsa-miR-1299 hsa-miR-33a-5p hsa-miR-4268 hsa-miR-4427 hsa-miR-4509 hsa-miR-338-5p hsa-miR-181a-2-3p hsa-miR-524-5p hsa-miR-6785-5p hsa-miR-5004-3p hsa-miR-23b-3p hsa-miR-377-5p hsa-miR-562 hsa-miR-429 hsa-miR-513a-5p hsa-miR-4330 hsa-miR-3681-3p hsa-miR-200c-3p hsa-miR-18b-5p hsa-miR-8067 hsa-miR-18a-5p hsa-miR-130b-5p hsa-miR-545-3p hsa-miR-200b-3p hsa-miR-6780b-5p hsa-miR-9-5p hsa-miR-4282 hsa-miR-548aa hsa-miR-23a-3p hsa-miR-489-3p hsa-miR-216a-3p hsa-miR-548j-3p hsa-miR-374c-5p hsa-miR-7-1-3p hsa-miR-130a-5p hsa-miR-651-3p hsa-miR-4652-3p hsa-miR-2110 hsa-miR-1250-3p hsa-miR-3187-5p hsa-miR-29a-5p hsa-miR-374a-5p hsa-miR-1285-3p hsa-miR-3121-3p hsa-miR-3662 hsa-miR-3941 hsa-miR-548f-5p hsa-miR-5692b hsa-miR-26b-3p hsa-miR-612 hsa-miR-6888-5p hsa-miR-514b-5p hsa-miR-4796-3p hsa-miR-7703 hsa-miR-7851-3p hsa-miR-607 hsa-miR-340-5p hsa-miR-3607-3p hsa-miR-126-5p hsa-miR-6507-5p hsa-miR-488-5p hsa-miR-6860 hsa-miR-578 hsa-miR-495-3p hsa-miR-4775 hsa-miR-4766-5p hsa-miR-5692c hsa-miR-3942-3p hsa-miR-3653-3p " hsa-miR-4482-3p hsa-miR-3613-3p hsa-miR-6502-5p hsa-miR-4762-3p hsa-miR-1910-3p hsa-miR-152-5p hsa-miR-6511a-5p hsa-miR-4666a-3p hsa-miR-3920 hsa-miR-1207-3p hsa-miR-362-3p hsa-miR-205-5p hsa-miR-548t-3p hsa-miR-548aw hsa-miR-3609 hsa-miR-597-3p hsa-miR-4477a hsa-miR-548x-5p hsa-miR-362-5p hsa-miR-3679-3p hsa-miR-1468-3p hsa-miR-5580-3p hsa-miR-7850-5p hsa-miR-4719 hsa-miR-6802-3p hsa-miR-382-3p hsa-miR-149-3p hsa-miR-369-3p hsa-miR-1236-3p hsa-miR-3934-5p hsa-miR-655-3p hsa-miR-4735-3p hsa-miR-6508-5p hsa- |

|        |    |                                                                                                                                                                                                                                                                                                                                                                                                                                                                                                                                                                                                                                                                                                   |
|--------|----|---------------------------------------------------------------------------------------------------------------------------------------------------------------------------------------------------------------------------------------------------------------------------------------------------------------------------------------------------------------------------------------------------------------------------------------------------------------------------------------------------------------------------------------------------------------------------------------------------------------------------------------------------------------------------------------------------|
|        |    | miR-655-5p hsa-miR-4680-3p hsa-miR-410-3p hsa-miR-27b-3p hsa-miR-6885-3p hsa-miR-507 hsa-miR-548m hsa-miR-182-3p hsa-miR-128-3p hsa-miR-548g-5p hsa-miR-513c-5p hsa-miR-3173-3p hsa-miR-6086 hsa-miR-4448 hsa-miR-548ap-3p hsa-miR-7856-5p hsa-miR-544a-3p hsa-miR-365a-5p hsa-miR-4446-5p hsa-miR-361-3p hsa-miR-4517 hsa-miR-590-3p hsa-miR-6883-5p hsa-miR-548n hsa-miR-5589-5p hsa-miR-4796-5p hsa-miR-3128 hsa-miR-520d-5p hsa-miR-5189-5p hsa-miR-5187-3p hsa-let-7c-3p hsa-miR-4731-5p hsa-miR-5688 hsa-miR-1301-5p hsa-miR-551b-5p hsa-miR-4653-3p hsa-miR-1252-3p hsa-miR-6809-3p hsa-miR-6875-3p hsa-miR-27a-3p hsa-miR-4753-3p hsa-miR-603 hsa-miR-4505 hsa-miR-3124-3p hsa-miR-33b-5p |
| miRDB  | 0  |                                                                                                                                                                                                                                                                                                                                                                                                                                                                                                                                                                                                                                                                                                   |
| miRmap | 36 | hsa-miR-579 hsa-miR-605 hsa-miR-3116 hsa-miR-1254 hsa-miR-6514-5p hsa-miR-5698 hsa-miR-548ae hsa-miR-4802-5p hsa-miR-371b-5p hsa-miR-6499-3p hsa-miR-4668-3p hsa-miR-499a-3p hsa-miR-5696 hsa-miR-548z hsa-miR-320e hsa-miR-3153 hsa-miR-548d-3p hsa-miR-5010-5p hsa-miR-489 hsa-miR-373-5p hsa-miR-548h-3p hsa-miR-371a-5p hsa-miR-425-5p hsa-miR-548ac hsa-miR-661 hsa-miR-499b-3p hsa-miR-625-5p hsa-miR-4525 hsa-miR-330-3p hsa-miR-6514-3p hsa-miR-616-5p hsa-miR-5586-5p hsa-miR-3944-5p hsa-miR-4723-5p hsa-miR-664b-3p hsa-miR-105-5p                                                                                                                                                     |

A) TargetScan database

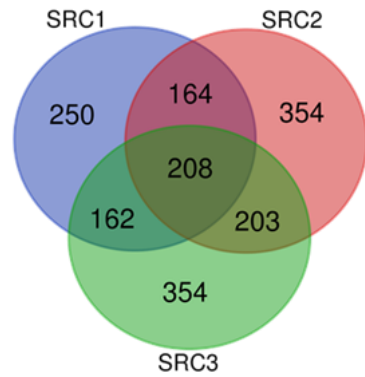

B) miRDB database

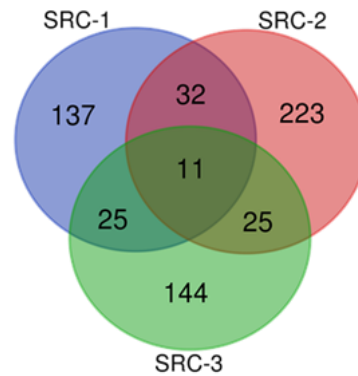

C) miRmap database

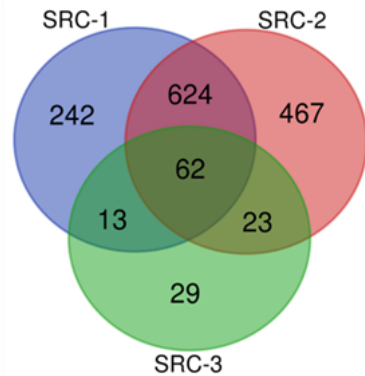

D) miRmap database

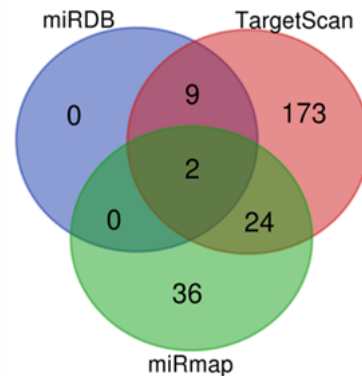

E)

| SRC-1                            | Predicted consequential pairing of target region (top) and miRNA (bottom) |
|----------------------------------|---------------------------------------------------------------------------|
| Position 862-868 of NCOA1 3' UTR | 5' ...AGUUUGGGGAAAAUGCAAUAU...                                            |
| hsa-miR-137                      | 3' GAUGCGCAUAAGAAUUCGUUAUU                                                |

| SRC-2                              | Predicted consequential pairing of target region (top) and miRNA (bottom) |
|------------------------------------|---------------------------------------------------------------------------|
| Position 1245-1252 of NCOA2 3' UTR | 5' ...AUUUUAUUGUAAACAAGCAAUA...                                           |
| hsa-miR-137                        | 3' GAUGCGCAUAAGAAUUCGUUAUU                                                |
| Position 3553-3559 of NCOA2 3' UTR | 5' ...ACAAGGGUAAAAUUAGCAAUAU...                                           |
| hsa-miR-137                        | 3' GAUGCGCAUAAGAAUUCGUUAUU                                                |

| SRC-3                              | Predicted consequential pairing of target region (top) and miRNA (bottom) |
|------------------------------------|---------------------------------------------------------------------------|
| Position 869-876 of NCOA3 3' UTR   | 5' ...UUGCCUAUAGGUAGAGCAAUA...                                            |
| hsa-miR-137                        | 3' GAUGCGCAUAAGAAUUCGUUAUU                                                |
| Position 1933-1940 of NCOA3 3' UTR | 5' ...UUGGUAUCAUUUUCUAGCAAUA...                                           |
| hsa-miR-137                        | 3' GAUGCGCAUAAGAAUUCGUUAUU                                                |
| Position 3245-3251 of NCOA3 3' UTR | 5' ...AGAAUAAAAUAGAG--AGCAAUAU...                                         |
| hsa-miR-137                        | 3' GAUGCGCAUAAGAAUUCGUUAUU                                                |

**Supplementary Figure S1.** The diagrams represent the prediction analysis of microRNA-targets for genes p160 coactivators using three databases: TargetScan, miRDB, and miRmap. A) The TargetScan database displays 208 microRNAs that are common to all three genes (SRC-1, SRC-2, and SRC-3). B) The miRDB database displays 11 microRNAs that are common to all three genes. C) The miRmap database displays 62 microRNAs that are common to all three genes. D) Venn diagram shows the intersection of microRNAs for SRC-1, SRC-2, and SRC-3 genes among the three databases. Among all the microRNAs identified, only hsa-miR-137 and hsa-miR-3646 showed interaction regions with three p160 coactivators. E) Sequence of the binding regions between miR-137 and its targets, SRC-1, SRC-2, and SRC-3.

Eedunuri,VK et al. *Mol Endocrinol*, 2015.

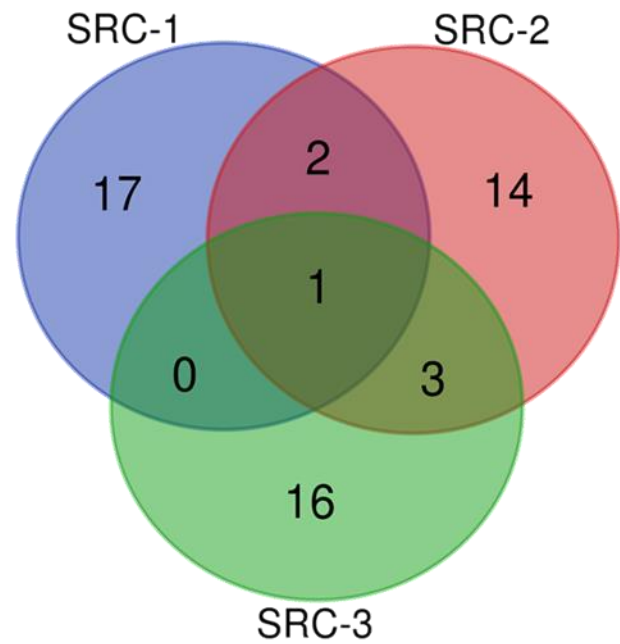

| Names               | Total | microRNAs                                                                                                                                                            |
|---------------------|-------|----------------------------------------------------------------------------------------------------------------------------------------------------------------------|
| SRC-1; SRC-2; SRC-3 | 1     | miR-137.                                                                                                                                                             |
| SRC-1; SRC-2        | 2     | miR-590-3p; miR-495.                                                                                                                                                 |
| SRC-1; SRC-3        | 0     | -                                                                                                                                                                    |
| SRC-2; SRC-3        | 3     | miR-429; miR-200b; miR-200c.                                                                                                                                         |
| SRC-1               | 17    | miR-18a; miR-219-5p; miR-454; miR-130a; miR-374a; miR-374b; miR-23a; miR-301a; miR-182; miR-32; miR-216a; miR-34a; miR-129-5p; miR-130b; miR-152; miR-18b; miR-301b. |
| SRC-2               | 14    | miR-381; miR-21; miR-410; miR-448; miR-181b; miR-181c; miR-186; miR-181a; miR-875-5p; miR-4282; miR-214-5p; miR-590-5p; miR-199a; miR-30.                            |
| SRC-3               | 16    | miR-17-5p; miR-520d-3p; miR-106a; miR-20a; miR-216b; miR-519d; miR-29b; miR-372; miR-520e; miR-520c-3p; miR-29c; miR-29a; miR-106b; miR-93; miR-20b; miR-520b.       |

**Supplementary Figure S2.** In silico prediction of the microRNA targets for p160 coactivators based on the study validated by Eedunuri et al. (2015).

## AUTENTICAÇÃO DE LINHAGENS

Laudo do Perfil de STR's / STR Profile Report

## INFORMAÇÃO DO CLIENTE / CUSTOMER INFORMATION

|                                                      |                                         |
|------------------------------------------------------|-----------------------------------------|
| Nome / Name                                          | IRAN AMORIM DA SILVA                    |
| Instituição / Institution                            | HCFMUSP                                 |
| Departamento / Department                            | CIRURGIA                                |
| Telefone / Phone                                     | 1130617183                              |
| E-mail                                               | iransilva@gmail.com                     |
| Nome da Linhagem / Cell line name                    | PC3LUC2 (ATCC CRL1435LUC2)              |
| Amostra recebida em / Samples received in 00-00-0000 | Data do laudo / Report date: 16-12-2019 |

| Loci                                                                                                                                          | Resultado do Teste / Test Result (amostra/sample) |    |  |  | Perfil da referência no Banco de Dados / Reference Database Profile |    |  |     |
|-----------------------------------------------------------------------------------------------------------------------------------------------|---------------------------------------------------|----|--|--|---------------------------------------------------------------------|----|--|-----|
|                                                                                                                                               | Perfil da Amostra / Query Profile PC3LUC2         |    |  |  | Perfil da referência / Database Profile PC-3 (ATCC:CRL-1435)        |    |  |     |
| TH01                                                                                                                                          | 6                                                 | 7  |  |  | 6                                                                   | 7  |  |     |
| TPOX                                                                                                                                          | 8                                                 | 9  |  |  | 8                                                                   | 9  |  |     |
| vWA                                                                                                                                           | 17                                                |    |  |  | 17                                                                  |    |  |     |
| CSF1PO                                                                                                                                        | 11                                                |    |  |  | 11                                                                  |    |  |     |
| D16S539                                                                                                                                       | 11                                                |    |  |  | 11                                                                  |    |  |     |
| D7S820                                                                                                                                        | 8                                                 | 11 |  |  | 8                                                                   | 11 |  |     |
| D13S317                                                                                                                                       | 11                                                |    |  |  | 11                                                                  |    |  |     |
| D5S818                                                                                                                                        | 13                                                |    |  |  | 13                                                                  |    |  |     |
| D21S11                                                                                                                                        |                                                   |    |  |  |                                                                     |    |  |     |
| Amelogenin                                                                                                                                    | x                                                 |    |  |  | x                                                                   |    |  |     |
| Número de alelos iguais entre a amostra e referência / Number of shared alleles between query sample and database profile:                    |                                                   |    |  |  |                                                                     |    |  | 12  |
| Total de alelos na amostra referência / Total number of alleles in the database profile:                                                      |                                                   |    |  |  |                                                                     |    |  | 12  |
| Porcentagem de correspondência entre alelos da amostra e da referência / Percent match between the submitted sample and the database profile: |                                                   |    |  |  |                                                                     |    |  | 100 |

## RESULTADO / RESULT

Linhagens celulares com uma porcentagem de correspondência  $\geq 80\%$  são consideradas relacionadas, ou seja, derivada de um ancestral comum. Linhagens com porcentagem de correspondência entre 55% e 80% necessitam de novos testes (maior número de marcadores) para confirmar sua autenticidade. / Cell lines with  $\geq 80\%$  match are considered to be related; i.e., derived from a common ancestry. Cell lines with between a 55% to 80% match require further profiling for authentication of relatedness. (ATCC - STR Profile Report)

## METODOLOGIA / METHODOLOGY

10 STRs correspondendo aos loci TH01, TPOX, vWA, CSF1PO, D16S539, D7S820, D13S317, D5S818, Amelogenin e D21S11 (GenePrint 10 / Promega), foram amplificados e submetidos à eletroforese capilar para separação dos fragmentos (3730 DNA Analyzer - Applied Biosystems). Os dados foram analisados através do software XXX GeneMaker HDI v.1.1.0 (Softgenetics LLC). Controles positivos e negativos apropriados foram utilizados na validação de cada amostra. / 10 STRs (TH01, TPOX, vWA, CSF1PO, D16S539, D7S820, D13S317, D5S818, Amelogenin and D21S11 - GenePrint 10 / Promega) are co-amplified and submitted to capillary electrophoresis (3730 DNA Analyzer - Applied Biosystems). An internal lane standard (ILS) and allelic ladder are provided for sizing and genotyping of amplified fragments, and the 2800M Control DNA is supplied as a positive control (GenePrint 10 / Promega). Data is analyzed using software GeneMaker HDI v.1.1.0 (Softgenetics LLC).

## INTERPRETAÇÃO DOS DADOS / INTERPRETATION OF DATA

Os resultados foram interpretados segundo as diretrizes do ANSI Standards 2011 (ASN-0002 / ATCC Standards Development Organization) / Results were interpreted as described in ANSI Standards 2011 (ASN-0002 / ATCC Standards Development Organization / ATCC STR Profile Report)

☐ A linhagem enviada para análise é de origem humana, mas o seu perfil não corresponde a nenhuma linhagem padrão presente nos bancos de dados analisados / The submitted sample profile is of human origin, but not a match for any profile in the STR database

☒ A linhagem enviada para análise corresponde exatamente à seguinte linhagem celular humana / The submitted profile is an exact match for the following human cell line(s):  
PC-3 Prostate Adenocarcinoma Human (ATCC:CRL-1435)

☐ O perfil de marcadores da linhagem enviada é similar à(s) seguinte(s) linhagem(s) celular(es) humana(s) / The submitted profile is similar to the following ATCC human cell line(s):

## OBSERVAÇÕES / Additional Comments

[https://www.atcc.org/en/STR\\_Database.aspx](https://www.atcc.org/en/STR_Database.aspx) Obs: A linhagem parece ter sido geneticamente modificada

Responsável Técnico: Christian Albert Merkel  
Email: c.merkel@fm.usp.br

**Supplementary Table S5.** TaqMan™ Assay tables were used in the study.

| <b>Genes</b> | <b>Assay</b>  | <b>Company</b>     |
|--------------|---------------|--------------------|
| SRC-1        | Hs00186661_m1 | Applied Biosystems |
| SRC-2        | Hs00896109_m1 | Applied Biosystems |
| SRC-3        | Hs00180722_m1 | Applied Biosystems |
| AR           | Hs00171172-m1 | Applied Biosystems |
| GAPDH        | Hs99999905    | Applied Biosystems |

**Supplementary Table S6.** Antibody tables used in work.

| <b>Proteins</b> | <b>Cat</b> | <b>Company</b> |
|-----------------|------------|----------------|
| SRC-1           | 128E7      | Cell Signaling |
| SRC-2           | D2X4M      | Cell Signaling |
| SRC-3           | 5E11       | Cell Signaling |
| AR              | MA5-13426  | Invitrogen     |
